# Supplementary material for: Palladium-catalyzed direct reductive cross-coupling of aryltrimethylammonium salts with aryl bromides
Source: Royal Society of Chemistry journal article supplement (doi:10.1039/d1qo00759a), 2021-01-01

## Supporting Information

### **Palladium-catalyzed direct reductive cross-coupling of aryltrimethylammonium salts with aryl bromides**

Chen Zhang,<sup>a</sup> Na-Na Ma,<sup>a</sup> Zi-Lun Yu,<sup>a</sup> Chuanji Shen,<sup>b</sup> Xiaocong Zhou,<sup>\*b</sup> Xue-Qiang Chu,<sup>a</sup>  
Weidong Rao,<sup>c</sup> Zhi-Liang Shen<sup>\*a</sup>

<sup>a</sup> Technical Institute of Fluorochemistry (TIF), Institute of Advanced Synthesis, School of Chemistry and Molecular Engineering, Nanjing Tech University, Nanjing 211816, China. E-mail: ias\_zlshen@njtech.edu.cn.

<sup>b</sup> College of Biological, Chemical Science and Engineering, Jiaying University, 118 Jiahang Road, Jiaying 314001, China. E-mail: xczhou@zjxu.edu.cn.

<sup>c</sup> Jiangsu Provincial Key Lab for the Chemistry and Utilization of Agro-Forest Biomass, College of Chemical Engineering, Nanjing Forestry University, Nanjing 210037, China.

### **Table of Contents**

|                                                                                   |          |
|-----------------------------------------------------------------------------------|----------|
| General information.....                                                          | page S2  |
| Optimization of Reaction Conditions.....                                          | page S2  |
| Experimental procedure.....                                                       | page S3  |
| Characterization data of products.....                                            | page S4  |
| References.....                                                                   | page S13 |
| <sup>1</sup> H, <sup>13</sup> C, and <sup>19</sup> F NMR spectra of products..... | page S14 |

## General Information

Analytical thin layer chromatography (TLC) was performed using silica gel plate (0.2 mm thickness). Subsequent to elution, plates were visualized using UV radiation (254 nm). Flash chromatography was performed using Merck silica gel (200-300 mesh) for column chromatography with freshly distilled solvents. Columns were typically packed as slurry and equilibrated with the appropriate solvent system prior to use. IR spectra were recorded on a FT-IR spectrophotometer using KBr optics.  $^1\text{H}$ ,  $^{19}\text{F}$ , and  $^{13}\text{C}$  NMR spectra were recorded in  $\text{CDCl}_3$  on Bruker Avance or Jeol 400 MHz spectrometers. Tetramethylsilane (TMS) served as internal standard for  $^1\text{H}$ ,  $^{19}\text{F}$ , and  $^{13}\text{C}$  NMR analysis. High resolution mass spectra (HRMS) were obtained using a commercial apparatus (ESI or EI Source).

## Optimization of Reaction Conditions

**Table S1. Optimization of Reaction Conditions by Using Different Solvents**



| entry | solvent     | yield (%) <sup>a</sup> | entry | solvent            | yield (%) <sup>a</sup> |
|-------|-------------|------------------------|-------|--------------------|------------------------|
| 1     | DMF         | 0                      | 6     | <sup>t</sup> BuOMe | 0                      |
| 2     | DMA         | 0                      | 7     | THF                | 94 (29) <sup>b</sup>   |
| 3     | MeCN        | 0                      | 8     | DME                | 0                      |
| 4     | DMSO        | 0                      | 9     | Et <sub>2</sub> O  | 0                      |
| 5     | 1,4-dioxane | 0                      | 10    | CpOMe              | 0                      |

<sup>a</sup> Yields were determined by using 1,4-dimethoxybenzene as an internal standard. <sup>b</sup> Reaction was performed under 60 °C.

**Table S2. Optimization of Reaction Conditions by Using Different Metals**

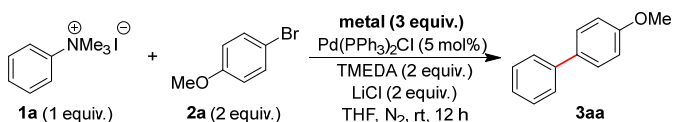

| entry | metal | yield (%) <sup>a</sup> | entry | metal | yield (%) <sup>a</sup> |
|-------|-------|------------------------|-------|-------|------------------------|
| 1     | Mg    | 94                     | 6     | Ga    | 0                      |
| 2     | Al    | 0                      | 7     | Bi    | 0                      |
| 3     | Zn    | 0                      | 8     | Fe    | 0                      |
| 4     | Mn    | 0                      | 9     | Sn    | 0                      |
| 5     | In    | 0                      | 10    | Pb    | 0                      |

<sup>a</sup> Yields were determined by using 1,4-dimethoxybenzene as an internal standard.

**Table S3. Optimization of Reaction Conditions by Using Different Catalysts**

| entry | catalyst                                           | yield (%) <sup>a</sup> |
|-------|----------------------------------------------------|------------------------|
| 1     | Pd(PPh <sub>3</sub> ) <sub>2</sub> Cl <sub>2</sub> | 94                     |
| 2     | Co(PPh <sub>3</sub> ) <sub>2</sub> Cl <sub>2</sub> | <5                     |
| 3     | Ni(PPh <sub>3</sub> ) <sub>2</sub> Cl <sub>2</sub> | 0                      |
| 4     | CuCl <sub>2</sub>                                  | <5                     |
| 5     | FeCl <sub>3</sub>                                  | <5                     |
| 6     | CrCl <sub>2</sub>                                  | 0                      |

<sup>a</sup> Yields were determined by using 1,4-dimethoxybenzene as an internal standard.

**Table S4. Optimization of Reaction Conditions by Using Different Aryltrimethylammonium Salts**

| entry | X   | yield (%) <sup>a</sup> |
|-------|-----|------------------------|
| 1     | I   | 94                     |
| 2     | Cl  | 77                     |
| 3     | Br  | 80                     |
| 4     | OTf | 78                     |

<sup>a</sup> Yields were determined by using 1,4-dimethoxybenzene as an internal standard.

## Experimental Procedure

### Typical procedures for the cross-coupling reaction between aryltrimethylammonium salts with aryl bromides (taking product 3aa as an example)

To an oven-dried sealed tube equipped with a magnetic stir bar was added magnesium turnings (72.9 mg, 3 mmol) and LiCl (84.8 mg, 2 mmol). Then the mixture was dried under reduced pressure with a heat gun (320 °C) for 3 min. After cooling to room temperature, dry THF (3 mL) was added and the sealed tube was backfilled with nitrogen (x3). Then aryltrimethylammonium iodide (**1a**, 263.1 mg, 1 mmol) and Pd(PPh<sub>3</sub>)<sub>2</sub>Cl<sub>2</sub> (35.1 mg, 0.05 mmol) were weighed into the tube, after which 4-bromoanisole (**2a**, 374.1 mg, 2 mmol) and TMEDA (232.4 mg, 2 mmol) were added by syringe. Then the mixture was stirred at room temperature for 12 h. The resulting mixture was then quenched with saturated NH<sub>4</sub>Cl solution and extracted with EtOAc (20 mL x3). The organic layers were

combined and washed with brine, dried over Na<sub>2</sub>SO<sub>4</sub>. The extracts were concentrated under reduced pressure to afford the crude product, which was further purified through silica gel column chromatography (using EtOAc/petroleum ether as eluents) to yield the product **3aa** as a white solid.

#### Typical procedures for the synthesis of different aryltrimethylammonium salts

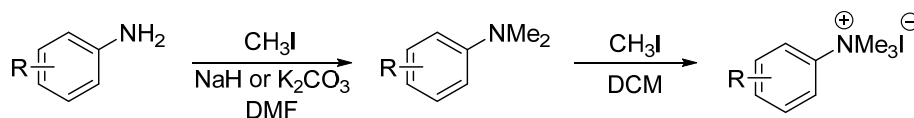

The aryltrimethylammonium salts were synthesized according to reported methods by a two-step procedure.

**Step 1:**<sup>1-2</sup> Aniline (10 mmol, 1 equiv.), K<sub>2</sub>CO<sub>3</sub> (30 mmol, 4.14 g) and DMF (50 mL) were added to a 100 mL round-bottomed flask equipped with a magnetic stir bar under N<sub>2</sub>. The mixture was stirred at room temperature and iodomethane (1.25 mL, 20 mmol, 2 equiv.) was added dropwise. After completion of the reaction (monitored by TLC), the resulting mixture was diluted with water and the solution was extracted with DCM, washed with brine, dried over Na<sub>2</sub>SO<sub>4</sub>. Solvents were removed under reduced pressure and the crude product was purified by silica gel column chromatography.

**Step 2:**<sup>3-5</sup> To a solution of the above amine in DCM (10 mL) was dropwise added iodomethane (1.5 equiv.). The resulting mixture was stirred at room temperature and monitored by TLC. After completion of the reaction, solvent was removed under reduced pressure and the residue was filtered, washed with petroleum ether to yield the salt.

### Characterization data of products

#### 4-Methoxy-1,1'-biphenyl (**3aa**)

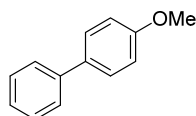

Yield = 90%, 165.4 mg (1 mmol scale with the use of 2 equiv. of aryl bromide **2a**). White solid.

**M.p.:** 83.5-85.1 °C.

**<sup>1</sup>H NMR (400 MHz, CDCl<sub>3</sub>):** δ 7.65–7.56 (m, 4H), 7.51–7.44 (m, 2H), 7.39–7.34 (m, 1H), 7.06–7.01 (m, 2H), 3.89 (s, 3H) ppm.

**<sup>13</sup>C NMR (100 MHz, CDCl<sub>3</sub>):** δ 159.0, 140.7, 133.7, 128.7, 128.1, 126.7, 126.6, 114.1, 55.3 ppm.

**IR (KBr):** ν = 2961, 2836, 1606, 1522, 1488, 1288, 1252, 1035, 834, 760, 688 cm<sup>-1</sup>.

**HRMS (m/z):** calcd for C<sub>13</sub>H<sub>13</sub>O [M+H]<sup>+</sup> 185.0961, found: 185.0965.

#### 3-Methoxy-1,1'-biphenyl (**3ab**)

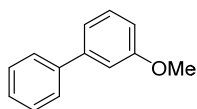

Yield = 70%, 128.2 mg (1 mmol scale with the use of 2 equiv. of aryl bromide **2b**). Yellow oil.

**<sup>1</sup>H NMR (400 MHz, CDCl<sub>3</sub>):** δ 7.51–7.46 (m, 2H), 7.35–7.29 (m, 2H), 7.26–7.20 (m, 2H), 7.07 (ddd, *J* = 7.6, 1.6, 1.0 Hz, 1H), 7.04–7.01 (m, 1H), 6.78 (ddd, *J* = 8.2, 2.6, 0.9 Hz, 1H), 3.73 (s, 3H) ppm.

**<sup>13</sup>C NMR (100 MHz, CDCl<sub>3</sub>):** δ 159.8, 142.7, 141.0, 129.7, 128.7, 127.4, 127.1, 119.6, 112.8, 112.6, 55.2 ppm.

**IR (KBr):**  $\nu$  = 3031, 2937, 2834, 1599, 1478, 1421, 1296, 1213, 1054, 757, 713, 698 cm<sup>-1</sup>.

**HRMS (m/z):** calcd for C<sub>13</sub>H<sub>13</sub>O [M+H]<sup>+</sup> 185.0961, found: 185.0970.

#### 4-Methoxy-3-methyl-1,1'-biphenyl (**3ac**)

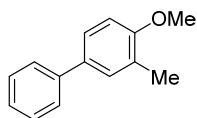

Yield = 93%, 185.2 mg (1 mmol scale with the use of 2 equiv. of aryl bromide **2c**). White solid.

**M.p.:** 74.8–75.8 °C.

**<sup>1</sup>H NMR (400 MHz, CDCl<sub>3</sub>):** δ 7.66–7.62 (m, 2H), 7.52–7.45 (m, 4H), 7.40–7.34 (m, 1H), 6.98–6.93 (m, 1H), 3.93 (s, 3H), 2.38 (s, 3H) ppm.

**<sup>13</sup>C NMR (100 MHz, CDCl<sub>3</sub>):** δ 157.3, 141.0, 133.2, 129.4, 128.6, 126.8, 126.7, 126.5, 125.3, 110.1, 55.3, 16.4 ppm.

**IR (KBr):**  $\nu$  = 1608, 1512, 1490, 1467, 1439, 1243, 1135, 1023, 887, 763, 752 cm<sup>-1</sup>.

**HRMS (m/z):** calcd for C<sub>14</sub>H<sub>15</sub>O [M+H]<sup>+</sup> 199.1117, found: 199.1123.

#### 2-Methyl-1,1'-biphenyl (**3ad**)

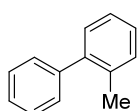

Yield = 78%, 131.2 mg (1 mmol scale with the use of 2 equiv. of aryl bromide **2d**). Colorless Oil.

**<sup>1</sup>H NMR (400 MHz, CDCl<sub>3</sub>):** δ 7.56–7.51 (m, 2H), 7.48–7.44 (m, 3H), 7.41–7.36 (m, 4H), 2.41 (s, 3H) ppm.

**<sup>13</sup>C NMR (100 MHz, CDCl<sub>3</sub>):** δ 141.9, 141.9, 135.3, 130.3, 129.8, 129.1, 128.0, 127.2, 126.7, 125.7, 20.4 ppm.

**IR (KBr):**  $\nu$  = 3059, 3019, 1479, 1438, 1010, 748, 701, 618, 562, 455 cm<sup>-1</sup>.

**HRMS (m/z):** calcd for C<sub>13</sub>H<sub>12</sub> [M+H]<sup>+</sup> 169.1012, found: 169.1013.

#### 3-Fluoro-4-methoxy-1,1'-biphenyl (**3ae**)

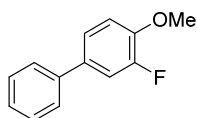

Yield = 86%, 173.9 mg (1 mmol scale with the use of 2 equiv. of aryl bromide **2e**). White solid.

**M.p.:** 88.2-89.3 °C.

**<sup>1</sup>H NMR (400 MHz, CDCl<sub>3</sub>):** δ 7.58–7.53 (m, 2H), 7.48–7.42 (m, 2H), 7.39–7.37 (m, 1H), 7.36–7.32 (m, 2H), 7.04 (t, *J* = 8.6 Hz, 1H), 3.94 (s, 3H) ppm.

**<sup>13</sup>C NMR (100 MHz, CDCl<sub>3</sub>):** δ 152.5 (d, *J* = 245.3 Hz), 146.9 (d, *J* = 10.8 Hz), 139.6 (d, *J* = 2.1 Hz), 134.3 (d, *J* = 6.6 Hz), 128.8, 127.2, 126.6, 122.6 (d, *J* = 3.5 Hz), 114.7 (d, *J* = 18.9 Hz), 113.5 (d, *J* = 2.6 Hz), 56.2 ppm.

**<sup>19</sup>F NMR (376 MHz, CDCl<sub>3</sub>):** δ -134.88–135.16 (m) ppm.

**IR (KBr):**  $\nu$  = 2976, 2844, 1617, 1584, 1530, 1494, 1414, 1313, 1296, 1136, 1015, 872, 754 cm<sup>-1</sup>.

**HRMS (m/z):** calcd for C<sub>13</sub>H<sub>12</sub>FO [M+H]<sup>+</sup> 203.0867, found: 203.0869.

### 3-Chloro-4-methoxy-1,1'-biphenyl (**3af**)

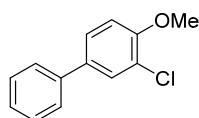

Yield = 54%, 116.9 mg (1 mmol scale with the use of 2 equiv. of aryl bromide **2f**). Colorless oil.

**<sup>1</sup>H NMR (400 MHz, CDCl<sub>3</sub>):** δ 7.59 (d, *J* = 7.4 Hz, 2H), 7.51–7.37 (m, 4H), 7.13 (d, *J* = 7.7 Hz, 2H), 3.98 (s, 3H) ppm.

**<sup>13</sup>C NMR (100 MHz, CDCl<sub>3</sub>):** δ 155.0, 141.2, 140.3, 130.3, 128.8, 127.6, 127.0, 121.5, 120.0, 110.9, 56.0 ppm.

**IR (KBr):**  $\nu$  = 3030, 2938, 2853, 1593, 1567, 1479, 1396, 1306, 1226, 1072, 855, 760, 717 cm<sup>-1</sup>.

**HRMS (m/z):** calcd for C<sub>13</sub>H<sub>12</sub>ClO [M+H]<sup>+</sup> 219.0571, found: 219.0575.

### 4-(Benzyloxy)-1,1'-biphenyl (**3ag**)

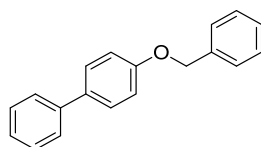

Yield = 81%, 210.4 mg (1 mmol scale with the use of 3 equiv. of aryl bromide **2g**). White solid.

**M.p.:** 128.8-130.1 °C.

**<sup>1</sup>H NMR (400 MHz, CDCl<sub>3</sub>):** δ 7.61–7.54 (m, 4H), 7.51–7.48 (m, 2H), 7.47–7.41 (m, 4H), 7.40–7.31 (m, 2H), 7.11–7.06 (m, 2H), 5.14 (s, 2H) ppm.

**<sup>13</sup>C NMR (100 MHz, CDCl<sub>3</sub>):** δ 158.3, 140.7, 136.9, 133.9, 128.7, 128.6, 128.1, 128.0, 127.5, 126.7, 126.7, 115.1, 70.0 ppm.

**IR (KBr):**  $\nu$  = 2923, 2907, 2865, 1608, 1523, 1488, 1468, 1453, 1377, 1249, 1198, 1021, 825, 760, 717, 695, 688 cm<sup>-1</sup>.

**HRMS (m/z):** calcd for C<sub>19</sub>H<sub>17</sub>O [M+H]<sup>+</sup> 261.1274, found: 261.1275.

### 5-Phenylbenzo[d][1,3]dioxole (**3ah**)

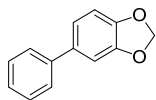

Yield = 91%, 179.7 mg (1 mmol scale with the use of 3 equiv. of aryl bromide **2h**). Yellow oil.  
**<sup>1</sup>H NMR (400 MHz, CDCl<sub>3</sub>):** δ 7.58–7.51 (m, 2H), 7.47–7.40 (m, 2H), 7.37–7.31 (m, 1H), 7.13–7.06 (m, 2H), 6.91 (dd, *J* = 7.8, 0.5 Hz, 1H), 6.01 (s, 2H) ppm.  
**<sup>13</sup>C NMR (100 MHz, CDCl<sub>3</sub>):** δ 148.0, 147.0, 140.9, 135.5, 128.7, 126.9, 126.8, 120.9, 108.5, 107.6, 101.1 ppm.  
**IR (KBr):**  $\nu$  = 1510, 1478, 1429, 1249, 1224, 1106, 1040, 937, 889, 812, 759, 712, 697 cm<sup>-1</sup>.  
**HRMS (m/z):** calcd for C<sub>13</sub>H<sub>11</sub>O<sub>2</sub> [M+H]<sup>+</sup> 199.0754, found: 199.0756.

### 6-Phenyl-2,3-dihydrobenzo[*b*][1,4]dioxine (**3ai**)

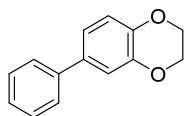

Yield = 86%, 183.0 mg (1 mmol scale with the use of 2 equiv. of aryl bromide **2i**). Colorless oil.  
**<sup>1</sup>H NMR (400 MHz, CDCl<sub>3</sub>):** δ 7.59–7.55 (m, 2H), 7.47–7.41 (m, 2H), 7.36–7.31 (m, 1H), 7.16 (d, *J* = 2.2 Hz, 1H), 7.12 (dd, *J* = 8.3, 2.2 Hz, 1H), 6.97 (d, *J* = 8.3 Hz, 1H), 4.31 (s, 4H) ppm.  
**<sup>13</sup>C NMR (100 MHz, CDCl<sub>3</sub>):** δ 143.6, 143.1, 140.5, 134.7, 128.7, 126.8, 126.7, 120.1, 117.5, 115.8, 64.4, 64.4 ppm.  
**IR (KBr):**  $\nu$  = 1590, 1574, 1518, 1485, 1309, 1283, 1246, 1226, 1070, 896, 764, 717, 698 cm<sup>-1</sup>.  
**HRMS (m/z):** calcd for C<sub>14</sub>H<sub>13</sub>O<sub>2</sub> [M+H]<sup>+</sup> 213.0910, found: 213.0914.

### [(1,1'-Biphenyl)-4-yloxy](*tert*-butyl)dimethylsilane (**3aj**)

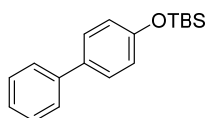

Yield = 75%, 212.6 mg (1 mmol scale with the use of 2 equiv. of aryl bromide **2j**). White solid.  
**M.p.:** 57.1–58.4 °C.  
**<sup>1</sup>H NMR (400 MHz, CDCl<sub>3</sub>):** δ 7.60 (dd, *J* = 8.3, 1.2 Hz, 2H), 7.54–7.50 (m, 2H), 7.46 (t, *J* = 7.6 Hz, 2H), 7.38–7.32 (m, 1H), 6.99–6.94 (m, 2H), 1.07 (s, 9H), 0.29 (s, 6H) ppm.  
**<sup>13</sup>C NMR (100 MHz, CDCl<sub>3</sub>):** δ 155.2, 140.8, 134.2, 128.7, 128.1, 126.7, 126.6, 120.3, 25.7, 18.2, -4.4 ppm.  
**IR (KBr):**  $\nu$  = 2957, 2927, 2857, 1602, 1487, 1404, 1251, 1172, 1110, 916, 847, 777, 692 cm<sup>-1</sup>.  
**HRMS (m/z):** calcd for C<sub>18</sub>H<sub>25</sub>OSi [M+H]<sup>+</sup> 285.1669, found: 285.1668.

### *N,N*-Dimethyl-[1,1'-biphenyl]-4-amine (**3ak**)

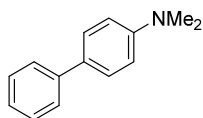

Yield = 76%, 150.2 mg (1 mmol scale with the use of 2 equiv. of aryl bromide **2k**). White solid.

**M.p.:** 122.7-123.2 °C.

**<sup>1</sup>H NMR (400 MHz, CDCl<sub>3</sub>):** δ 7.73–7.69 (m, 2H), 7.67–7.63 (m, 2H), 7.53 (t, *J* = 7.7 Hz, 2H), 7.39 (t, *J* = 7.3 Hz, 1H), 6.97–6.89 (m, 2H), 3.09 (s, 6H) ppm.

**<sup>13</sup>C NMR (100 MHz, CDCl<sub>3</sub>):** δ 149.8, 141.1, 129.2, 128.6, 127.6, 126.2, 125.9, 112.7, 40.5 ppm.

**IR (KBr):** ν = 1610, 1528, 1491, 1447, 1354, 1229, 956, 818, 760, 692 cm<sup>-1</sup>.

**HRMS (m/z):** calcd for C<sub>14</sub>H<sub>16</sub>N [M+H]<sup>+</sup> 198.1277, found: 198.1277.

### [1,1'-Biphenyl]-4-yl(methyl)sulfane (3al)

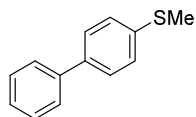

Yield = 66%, 132.1 mg (1 mmol scale with the use of 2 equiv. of aryl bromide **2l**). White solid.

**M.p.:** 110.6-111.2 °C.

**<sup>1</sup>H NMR (400 MHz, CDCl<sub>3</sub>):** δ 7.63–7.54 (m, 4H), 7.47 (td, *J* = 6.9, 1.7 Hz, 2H), 7.40–7.34 (m, 3H), 2.55 (s, 3H) ppm.

**<sup>13</sup>C NMR (100 MHz, CDCl<sub>3</sub>):** δ 140.4, 137.9, 137.5, 128.8, 127.4, 127.1, 126.8, 126.8, 15.8 ppm.

**IR (KBr):** ν = 2916, 1592, 1479, 1400, 1257, 1168, 1098, 1003, 954, 824, 754, 686 cm<sup>-1</sup>.

**HRMS (m/z):** calcd for C<sub>13</sub>H<sub>13</sub>S [M+H]<sup>+</sup> 201.0732, found: 201.0734.

### 2-([1,1'-Biphenyl]-3-yl)-2-methyl-1,3-dioxolane (3am)

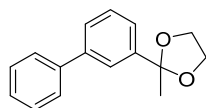

Yield = 91%, 220.0 mg (1 mmol scale with the use of 2 equiv. of aryl bromide **2m**). Colorless oil.

**<sup>1</sup>H NMR (400 MHz, CDCl<sub>3</sub>):** δ 7.76 (t, *J* = 1.7 Hz, 1H), 7.67–7.61 (m, 2H), 7.59–7.53 (m, 1H), 7.52–7.42 (m, 4H), 7.37 (tt, *J* = 6.7, 1.2 Hz, 1H), 4.08 (td, *J* = 6.1, 4.2 Hz, 2H), 3.89–3.78 (m, 2H), 1.74 (s, 3H) ppm.

**<sup>13</sup>C NMR (100 MHz, CDCl<sub>3</sub>):** δ 143.8, 141.1, 141.0, 128.7, 128.7, 127.3, 127.2, 126.6, 124.2, 124.0, 108.8, 64.4, 27.7 ppm.

**IR (KBr):** ν = 2987, 2887, 1599, 1478, 1452, 1413, 1373, 1220, 1200, 1038, 871, 759, 708 cm<sup>-1</sup>.

**HRMS (m/z):** calcd for C<sub>16</sub>H<sub>17</sub>O<sub>2</sub> [M+H]<sup>+</sup> 241.1223, found: 241.1233.

### 1-Phenylnaphthalene (3an)

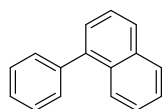

Yield = 74%, 151.1 mg (1 mmol scale with the use of 2 equiv. of aryl bromide **2n**). Colorless oil.

**<sup>1</sup>H NMR (400 MHz, CDCl<sub>3</sub>):** δ 8.12 – 7.99 (m, 3H), 7.70 – 7.54 (m, 9H) ppm.

**<sup>13</sup>C NMR (100 MHz, CDCl<sub>3</sub>):** δ 140.7, 140.2, 133.7, 131.5, 130.0, 128.2, 128.2, 127.6, 127.2, 126.9, 126.0, 126.0, 125.7, 125.3 ppm.

**IR (KBr):** ν = 3055, 1591, 1507, 1395, 1182, 1117, 1030, 1019, 802, 778, 760, 703, 615 cm<sup>-1</sup>.



**HRMS (m/z):** calcd for C<sub>16</sub>H<sub>13</sub> [M+H]<sup>+</sup> 205.1012, found: 205.1016.

### 2-Phenyldibenzo[*b,d*]furan (3ao)

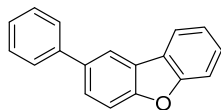

Yield = 66%, 153.4 mg (1 mmol scale with the use of 2 equiv. of aryl bromide **2o**). White solid.

**M.p.:** 181.8-182.9 °C.

**<sup>1</sup>H NMR (400 MHz, CDCl<sub>3</sub>):** δ 8.16 (dd, *J* = 1.9, 0.6 Hz, 1H), 8.01 (ddd, *J* = 7.6, 1.3, 0.6 Hz, 1H), 7.70 (dt, *J* = 8.2, 1.4 Hz, 3H), 7.66–7.60 (m, 2H), 7.54–7.47 (m, 3H), 7.44 – 7.36 (m, 2H) ppm.

**<sup>13</sup>C NMR (100 MHz, CDCl<sub>3</sub>):** δ 156.6, 155.7, 141.3, 136.4, 128.8, 127.4, 127.3, 127.0, 126.6, 124.7, 124.2, 122.8, 120.7, 119.2, 111.7 ppm.

**IR (KBr):** ν = 3054, 1603, 1471, 1446, 1202, 1187, 1121, 1022, 891, 843, 759, 747, 696, 573, 604, 429 cm<sup>-1</sup>.

**HRMS (m/z):** calcd for C<sub>18</sub>H<sub>13</sub>O [M+H]<sup>+</sup> 245.0961, found: 245.0960.

### 5-Phenylbenzofuran (3ap)

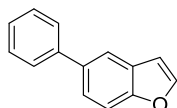

Yield = 38%, 74.7 mg (1 mmol scale with the use of 2 equiv. of aryl bromide **2p**). White solid.

**M.p.:** 65.9-67.2 °C.

**<sup>1</sup>H NMR (400 MHz, CDCl<sub>3</sub>):** δ 7.83–7.80 (m, 1H), 7.69–7.62 (m, 3H), 7.61–7.53 (m, 2H), 7.47 (t, *J* = 7.6 Hz, 2H), 7.39–7.34 (m, 1H), 6.84 (dd, *J* = 2.2, 0.8 Hz, 1H) ppm.

**<sup>13</sup>C NMR (100 MHz, CDCl<sub>3</sub>):** δ 154.5, 145.5, 141.6, 136.4, 128.7, 127.9, 127.4, 126.8, 123.9, 119.7, 111.5, 106.8 ppm.

**IR (KBr):** ν = 3144, 2923, 1536, 1462, 1428, 1233, 1163, 1107, 1026, 886, 823, 780, 696 cm<sup>-1</sup>.

**HRMS (m/z):** calcd for C<sub>14</sub>H<sub>11</sub>O [M+H]<sup>+</sup> 195.0804, found: 195.0810.

### 4-Methoxy-4'-(trifluoromethyl)-1,1'-biphenyl (3ba)

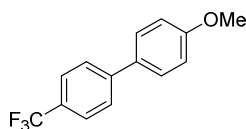

Yield = 95%, 120.3 mg (0.5 mmol scale with the use of 3 equiv. of aryl bromide **2a**). White solid.

**M.p.:** 121.4-122.3 °C.

**<sup>1</sup>H NMR (400 MHz, CDCl<sub>3</sub>):** δ 7.75–7.63 (m, 4H), 7.56 (d, *J* = 8.7 Hz, 2H), 7.02 (d, *J* = 8.7 Hz, 2H), 3.87 (s, 3H) ppm.

**<sup>13</sup>C NMR (100 MHz, CDCl<sub>3</sub>):** δ 159.8, 144.2, 132.1, 128.6 (q, *J* = 32.5 Hz), 128.3, 126.8, 124.4 (q, *J* = 271.8 Hz), 125.6 (q, *J* = 3.8 Hz), 114.4, 55.3 ppm.

**<sup>19</sup>F NMR (376 MHz, CDCl<sub>3</sub>):** δ -62.15 (s, 3F) ppm.

**IR (KBr):**  $\nu$  = 2965, 2937, 2844, 1604, 1502, 1337, 1298, 1277, 1261, 1122, 1076, 1036, 1012, 830, 816, 719, 703  $\text{cm}^{-1}$ .

**HRMS (m/z):** calcd for  $\text{C}_{14}\text{H}_{12}\text{F}_3\text{O}$   $[\text{M}+\text{H}]^+$  253.0835, found: 253.0843.

#### 4-Methoxy-4'-(trifluoromethoxy)-1,1'-biphenyl (3ca)

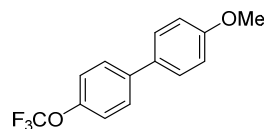

Yield = 92%, 247.9 mg (1 mmol scale with the use of 2 equiv. of aryl bromide **2a**). White solid.

**M.p.:** 97.9-99.8  $^{\circ}\text{C}$ .

**$^1\text{H}$  NMR (400 MHz,  $\text{CDCl}_3$ ):**  $\delta$  7.42-7.34 (m, 4H), 7.13 (d,  $J$  = 8.2 Hz, 2H), 6.85 (d,  $J$  = 8.5 Hz, 2H), 3.71 (s, 3H) ppm.

**$^{13}\text{C}$  NMR (100 MHz,  $\text{CDCl}_3$ ):**  $\delta$  159.4, 148.1, 139.6, 132.5, 128.1, 127.9, 121.2, 120.5 (q,  $J$  = 256.8 Hz), 114.3, 55.2 ppm.

**$^{19}\text{F}$  NMR (376 MHz,  $\text{CDCl}_3$ ):**  $\delta$  -57.70 (s, 3F) ppm.

**IR (KBr):**  $\nu$  = 2845, 1610, 1499, 1465, 1445, 1293, 1210, 1158, 1036, 1014, 828, 814  $\text{cm}^{-1}$ .

**HRMS (m/z):** calcd for  $\text{C}_{14}\text{H}_{12}\text{F}_3\text{O}_2$   $[\text{M}+\text{H}]^+$  269.0784, found: 269.0784.

#### 4-Fluoro-4'-methoxy-1,1'-biphenyl (3da)

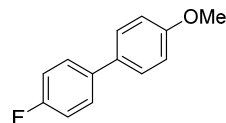

Yield = 95%, 192.4 mg (1 mmol scale with the use of 2 equiv. of aryl bromide **2a**). White solid.

**M.p.:** 91.1-91.6  $^{\circ}\text{C}$ .

**$^1\text{H}$  NMR (400 MHz,  $\text{CDCl}_3$ ):**  $\delta$  7.56-7.49 (m, 4H), 7.18-7.11 (m, 2H), 7.04-6.99 (m, 2H), 3.88 (s, 3H) ppm.

**$^{13}\text{C}$  NMR (100 MHz,  $\text{CDCl}_3$ ):**  $\delta$  162.0 (d,  $J$  = 245.4 Hz), 159.0, 136.9 (d,  $J$  = 3.3 Hz), 132.7, 128.1 (d,  $J$  = 8.0 Hz), 127.9, 115.5 (d,  $J$  = 21.4 Hz), 114.2, 55.2 ppm.

**$^{19}\text{F}$  NMR (376 MHz,  $\text{CDCl}_3$ ):**  $\delta$  -116.46 ppm.

**IR (KBr):**  $\nu$  = 3414, 1607, 1600, 1496, 1291, 1236, 1160, 1038, 1012, 826, 810, 791, 540  $\text{cm}^{-1}$ .

**HRMS (m/z):** calcd for  $\text{C}_{13}\text{H}_{12}\text{FO}$   $[\text{M}+\text{H}]^+$  203.0867, found: 203.0871.

#### 4-Chloro-4'-methoxy-1,1'-biphenyl (3ea)

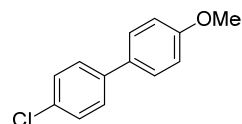

Yield = 98%, 214.3 mg (1 mmol scale with the use of 2 equiv. of aryl bromide **2a**). White solid.

**M.p.:** 112.1-113.5  $^{\circ}\text{C}$ .

**$^1\text{H}$  NMR (400 MHz,  $\text{CDCl}_3$ ):**  $\delta$  7.55-7.48 (m, 4H), 7.44-7.39 (m, 2H), 7.05-6.99 (m, 2H), 3.88 (s, 3H) ppm.

$^{13}\text{C}$  NMR (100 MHz,  $\text{CDCl}_3$ ):  $\delta$  159.2, 139.1, 132.5, 132.3, 128.7, 127.9, 127.8, 114.2, 55.2 ppm.

IR (KBr):  $\nu$  = 2962, 2936, 2839, 1606, 1485, 1309, 1263, 1199, 1132, 1037, 845, 821  $\text{cm}^{-1}$ .

HRMS (m/z): calcd for  $\text{C}_{13}\text{H}_{12}\text{ClO}$   $[\text{M}+\text{H}]^+$  219.0571, found: 219.0575.

#### 2-(4'-Methoxy-[1,1'-biphenyl]-4-yl)-1,3-dioxolane (3fa)

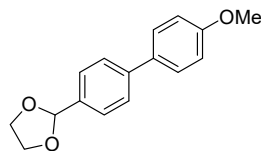

Yield = 99%, 127.7 mg (0.5 mmol scale with the use of 3 equiv. of aryl bromide **2a**). Brown solid.

M.p.: 105.4-106.8  $^{\circ}\text{C}$ .

$^1\text{H}$  NMR (400 MHz,  $\text{CDCl}_3$ ):  $\delta$  7.63-7.56 (m, 6H), 7.01 (d,  $J$  = 8.7 Hz, 2H), 5.89 (s, 1H), 4.20-4.13 (m, 2H), 4.12-4.03 (m, 2H), 3.86 (s, 3H) ppm.

$^{13}\text{C}$  NMR (100 MHz,  $\text{CDCl}_3$ ):  $\delta$  159.1, 141.5, 136.0, 133.0, 128.0, 126.7, 126.5, 114.0, 103.4, 65.1, 55.1 ppm.

IR (KBr):  $\nu$  = 2891, 2836, 1607, 1499, 1465, 1310, 1254, 1195, 1089, 1036, 960, 813, 698  $\text{cm}^{-1}$ .

HRMS (m/z): calcd for  $\text{C}_{16}\text{H}_{17}\text{O}_3$   $[\text{M}+\text{H}]^+$  257.1172, found: 257.1176.

#### 4-Methoxy-4'-methyl-1,1'-biphenyl (3ga)

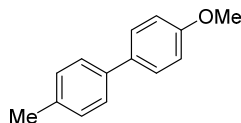

Yield = 94%, 186.8 mg (1 mmol scale with the use of 3 equiv. of aryl bromide **2a**). White solid.

M.p.: 109.3-109.8  $^{\circ}\text{C}$ .

$^1\text{H}$  NMR (400 MHz,  $\text{CDCl}_3$ ):  $\delta$  7.52-7.48 (m, 2H), 7.44 (d,  $J$  = 8.1 Hz, 2H), 7.21 (d,  $J$  = 8.6 Hz, 2H), 6.98-6.93 (m, 2H), 3.82 (s, 3H), 2.37 (s, 3H) ppm.

$^{13}\text{C}$  NMR (100 MHz,  $\text{CDCl}_3$ ):  $\delta$  158.8, 137.9, 136.3, 133.6, 129.4, 127.9, 126.5, 114.1, 55.3, 21.0 ppm.

IR (KBr):  $\nu$  = 2957, 2913, 2839, 1608, 1441, 1289, 1252, 1182, 1038, 1013, 842, 808, 498  $\text{cm}^{-1}$ .

HRMS (m/z): calcd for  $\text{C}_{14}\text{H}_{15}\text{O}$   $[\text{M}+\text{H}]^+$  199.1117, found: 199.1122.

#### 4'-Methoxy-3-methyl-1,1'-biphenyl (3ha)

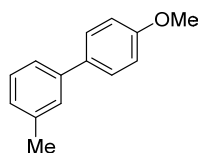

Yield = 94%, 186.9 mg (1 mmol scale with the use of 2 equiv. of aryl bromide **2a**). White solid.

M.p.: 52.4-53.7  $^{\circ}\text{C}$ .

$^1\text{H}$  NMR (400 MHz,  $\text{CDCl}_3$ ):  $\delta$  7.68-7.62 (m, 2H), 7.53-7.47 (m, 2H), 7.43 (t,  $J$  = 7.5 Hz, 1H), 7.27-7.23 (m, 1H), 7.11-7.06 (m, 2H), 3.92 (s, 3H), 2.53 (s, 3H) ppm.

$^{13}\text{C}$  NMR (100 MHz,  $\text{CDCl}_3$ ):  $\delta$  159.0, 140.7, 138.2, 133.7, 128.6, 128.0, 127.4, 127.3, 123.7,

114.0, 55.1, 21.5 ppm.

**IR (KBr):**  $\nu = 2955, 2837, 1605, 1516, 1486, 1441, 1295, 1252, 1195, 1028, 838, 787, 696, 578, 438 \text{ cm}^{-1}$ .

**HRMS (m/z):** calcd for  $\text{C}_{14}\text{H}_{15}\text{O}$   $[\text{M}+\text{H}]^+$  199.1117, found: 199.1124.

#### 4'-Methoxy-2-methyl-1,1'-biphenyl (3ia)

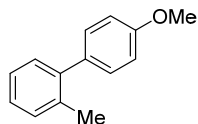

Yield = 79%, 157.5 mg (1 mmol scale with the use of 3 equiv. of aryl bromide **2a**). Colorless oil.

**$^1\text{H}$  NMR (400 MHz,  $\text{CDCl}_3$ ):**  $\delta$  7.39–7.32 (m, 6H), 7.08–7.04 (m, 2H), 3.93 (s, 3H), 2.39 (s, 3H) ppm.

**$^{13}\text{C}$  NMR (100 MHz,  $\text{CDCl}_3$ ):**  $\delta$  158.4, 141.4, 135.4, 134.2, 130.2, 130.2, 129.8, 126.9, 125.7, 113.4, 55.1, 20.5 ppm.

**IR (KBr):**  $\nu = 2953, 2834, 1613, 1516, 1483, 1464, 1441, 1267, 1244, 1176, 1039, 1018, 834, 787, 761, 586 \text{ cm}^{-1}$ .

**HRMS (m/z):** calcd for  $\text{C}_{14}\text{H}_{15}\text{O}$   $[\text{M}+\text{H}]^+$  199.1117, found: 199.1125.

#### 4'-Methoxy-3,5-dimethyl-1,1'-biphenyl (3ja)

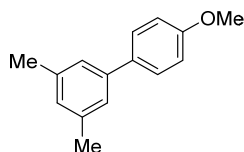

Yield = 82%, 173.3 mg (1 mmol scale with the use of 3 equiv. of aryl bromide **2a**). White solid.

**M.p.:** 45.3–47.1 °C.

**$^1\text{H}$  NMR (400 MHz,  $\text{CDCl}_3$ ):**  $\delta$  7.61–7.56 (m, 2H), 7.26–7.23 (m, 2H), 7.03 (dt,  $J = 6.6, 2.6$  Hz, 3H), 3.89 (s, 3H), 2.44 (s, 6H) ppm.

**$^{13}\text{C}$  NMR (100 MHz,  $\text{CDCl}_3$ ):**  $\delta$  158.9, 140.7, 138.1, 133.9, 128.3, 128.1, 124.6, 114.0, 55.2, 21.4 ppm.

**IR (KBr):**  $\nu = 2953, 2834, 1613, 1516, 1483, 1294, 1267, 1244, 1176, 1039, 834, 761, 731 \text{ cm}^{-1}$ .

**HRMS (m/z):** calcd for  $\text{C}_{15}\text{H}_{17}\text{O}$   $[\text{M}+\text{H}]^+$  213.1274, found: 213.1279.

#### *tert*-Butyl((4'-methoxy-[1,1'-biphenyl]-3-yl)oxy)dimethylsilane (3ka)

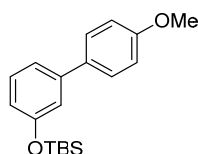

Yield = 84%, 264.5 mg (1 mmol scale with the use of 2 equiv. of aryl bromide **2a**). Colorless oil.

**$^1\text{H}$  NMR (400 MHz,  $\text{CDCl}_3$ ):**  $\delta$  7.56–7.51 (m, 2H), 7.29 (t,  $J = 7.9$  Hz, 1H), 7.17 (ddd,  $J = 7.7, 1.7, 1.0$  Hz, 1H), 7.08–7.05 (m, 1H), 7.02–6.97 (m, 2H), 6.82 (ddd,  $J = 8.0, 2.4, 1.0$  Hz, 1H), 3.87 (s, 3H), 1.04 (s, 9H), 0.26 (s, 6H) ppm.

**<sup>13</sup>C NMR (100 MHz, CDCl<sub>3</sub>):** δ 159.1, 155.9, 142.2, 133.5, 129.6, 128.1, 119.8, 118.5, 118.3, 114.1, 55.3, 25.7, 18.2, -4.4 ppm.

**IR (KBr):** ν = 2956, 2930, 2857, 1601, 1586, 1518, 1479, 1441, 1289, 1249, 1211, 1180, 940, 834, 784, 697, 573 cm<sup>-1</sup>.

**HRMS (m/z):** calcd for C<sub>19</sub>H<sub>27</sub>O<sub>2</sub>Si [M+H]<sup>+</sup> 315.1775, found: 315.1774.

### 2-(4-Methoxyphenyl)pyridine (3la)

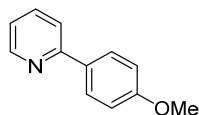

Yield = 44%, 82.0 mg (1 mmol scale with the use of 2 equiv. of aryl bromide **2a**). Yellow solid.

**M.p.:** 53.3-54.7 °C.

**<sup>1</sup>H NMR (400 MHz, CDCl<sub>3</sub>):** δ 8.65 (ddd, *J* = 4.8, 1.7, 1.0 Hz, 1H), 8.00–7.90 (m, 2H), 7.77–7.62 (m, 2H), 7.17 (ddd, *J* = 7.1, 4.8, 1.4 Hz, 1H), 7.06–6.93 (m, 2H), 3.86 (s, 3H) ppm.

**<sup>13</sup>C NMR (100 MHz, CDCl<sub>3</sub>):** δ 160.4, 157.1, 149.5, 136.6, 132.0, 128.1, 121.4, 119.8, 114.1, 55.3 ppm.

**IR (KBr):** ν = 2999, 2837, 1628, 1605, 1515, 1463, 1434, 1247, 1179, 1037, 840, 779, 739 cm<sup>-1</sup>.

**HRMS (m/z):** calcd for C<sub>12</sub>H<sub>12</sub>NO [M+H]<sup>+</sup> 186.0913, found: 186.0918.

## Reference

1. R. S. Lewis, M. F. Wisthoff, J. Grissmerson and W. J. Chain, Metal-Free Functionalization of *N,N*-Dialkylanilines via Temporary Oxidation to *N,N*-Dialkylaniline *N*-Oxides and Group Transfer. *Org. Lett.*, 2014, **16**, 3832-3835.
2. T. Saitoh, S. Yoshida and J. Ichikawa, 1,8-Bis(diphenylmethyl)naphthalenediyl Dication as an Organic Oxidant: Synthesis of Benzidines via Self-Coupling of *N,N*-Dialkylanilines. *Org. Lett.*, 2004, **6**, 4563-4565,
3. L.-G. Xie and Z.-X. Wang, Nickel-Catalyzed Cross-Coupling of Aryltrimethylammonium Iodides with Organozinc Reagents. *Angew. Chem. Int. Ed.*, 2011, **50**, 4901-4904.
4. X.-Q. Zhang and Z.-X. Wang, Cross-Coupling of Aryltrimethylammonium Iodides with Arylzinc Reagents Catalyzed by Amido Pincer Nickel Complexes. *J. Org. Chem.*, 2012, **77**, 3658-3663.
5. S. B. Blakey and D. W. C. MacMillan, The First Suzuki Cross-Couplings of Aryltrimethylammonium Salts. *J. Am. Chem. Soc.*, 2003, **125**, 6046-6047.

# <sup>1</sup>H, <sup>13</sup>C, and <sup>19</sup>F NMR spectra of products

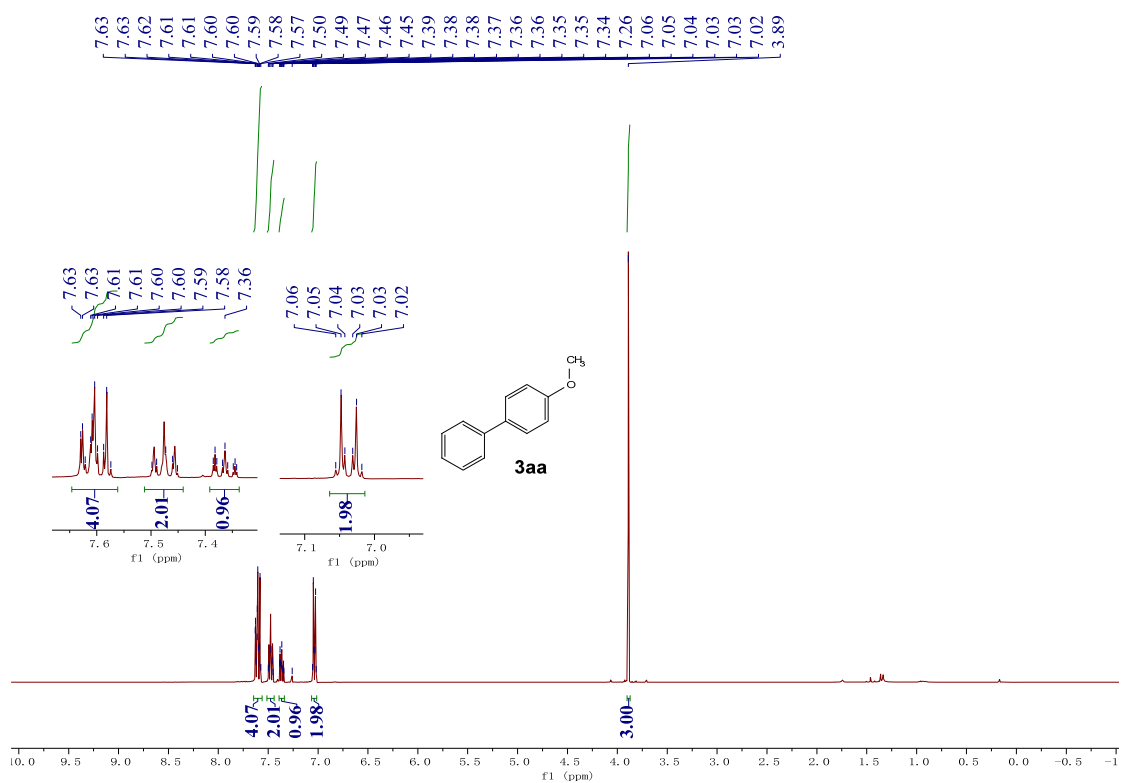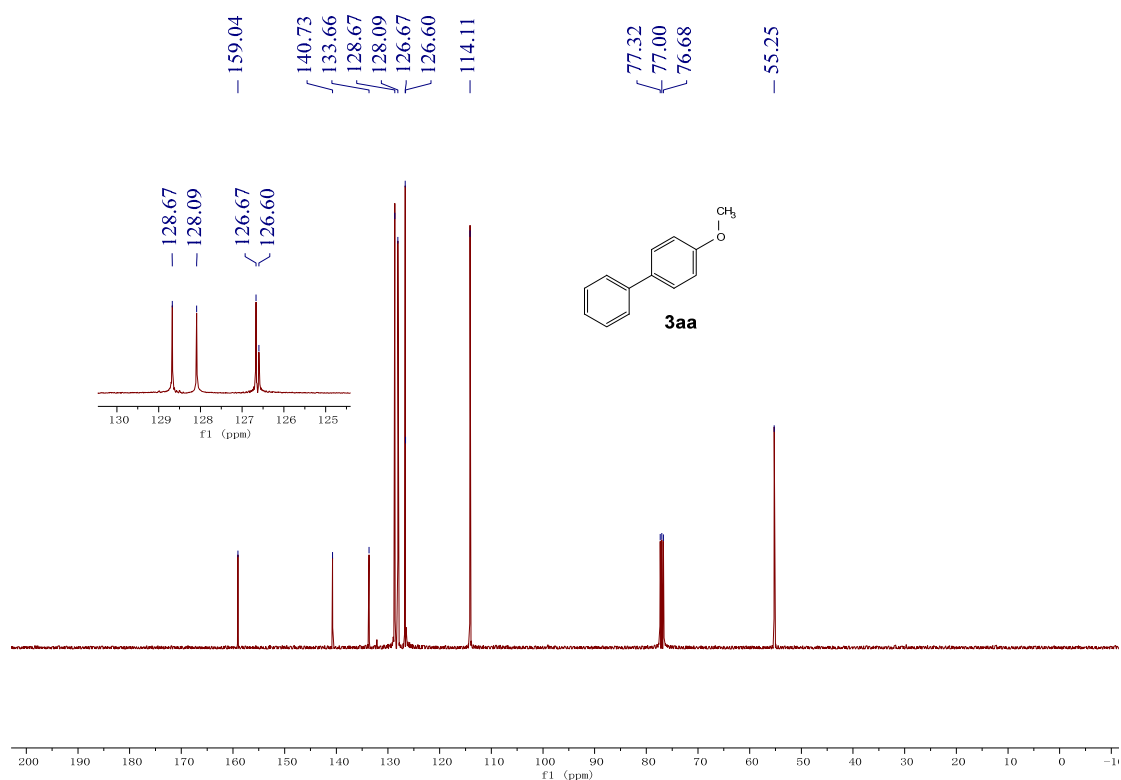

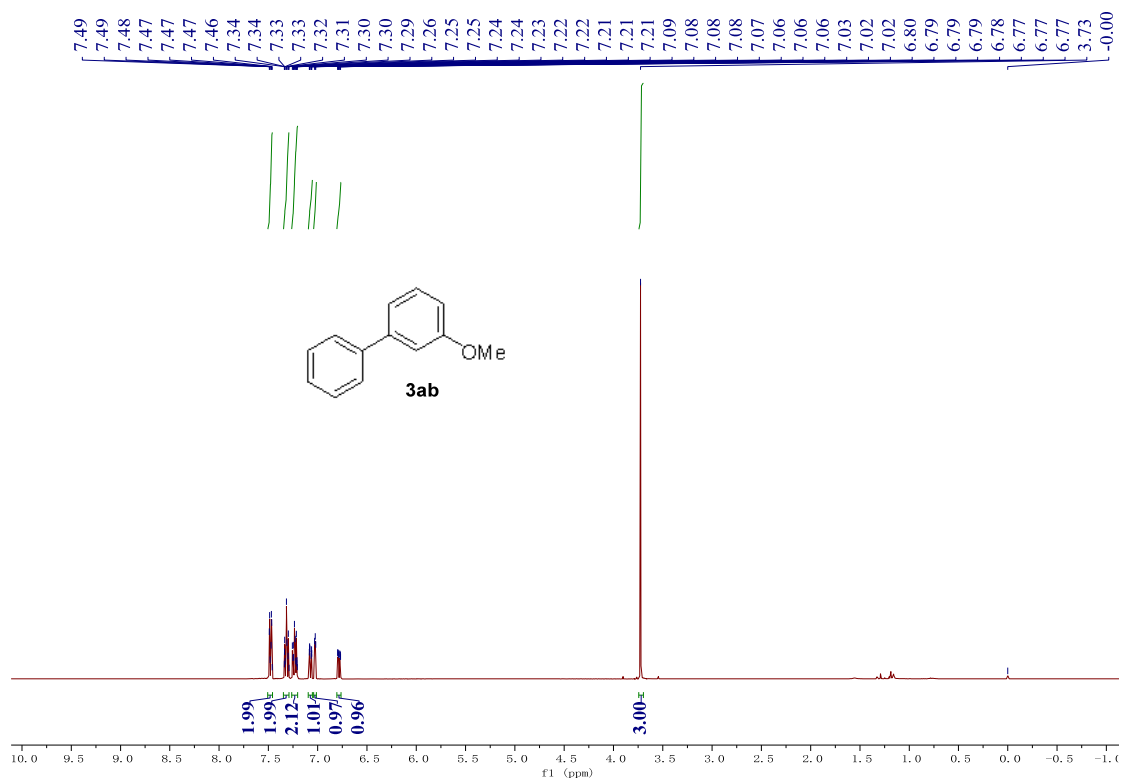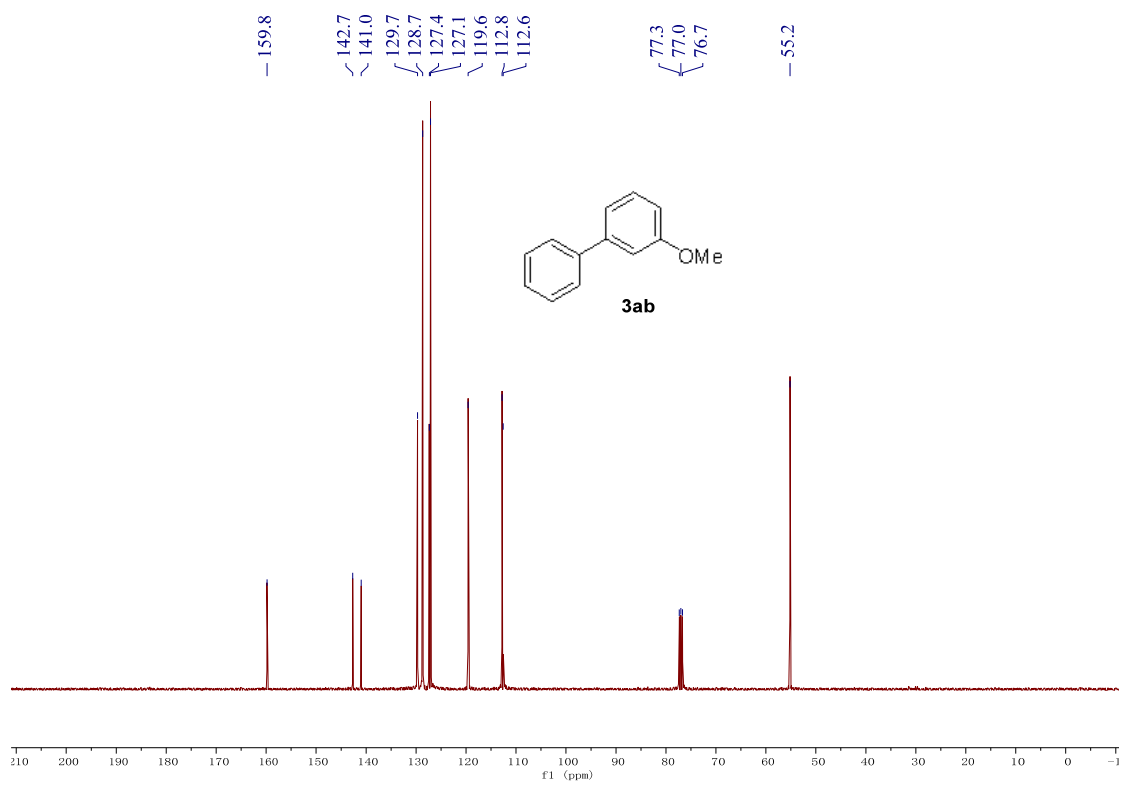

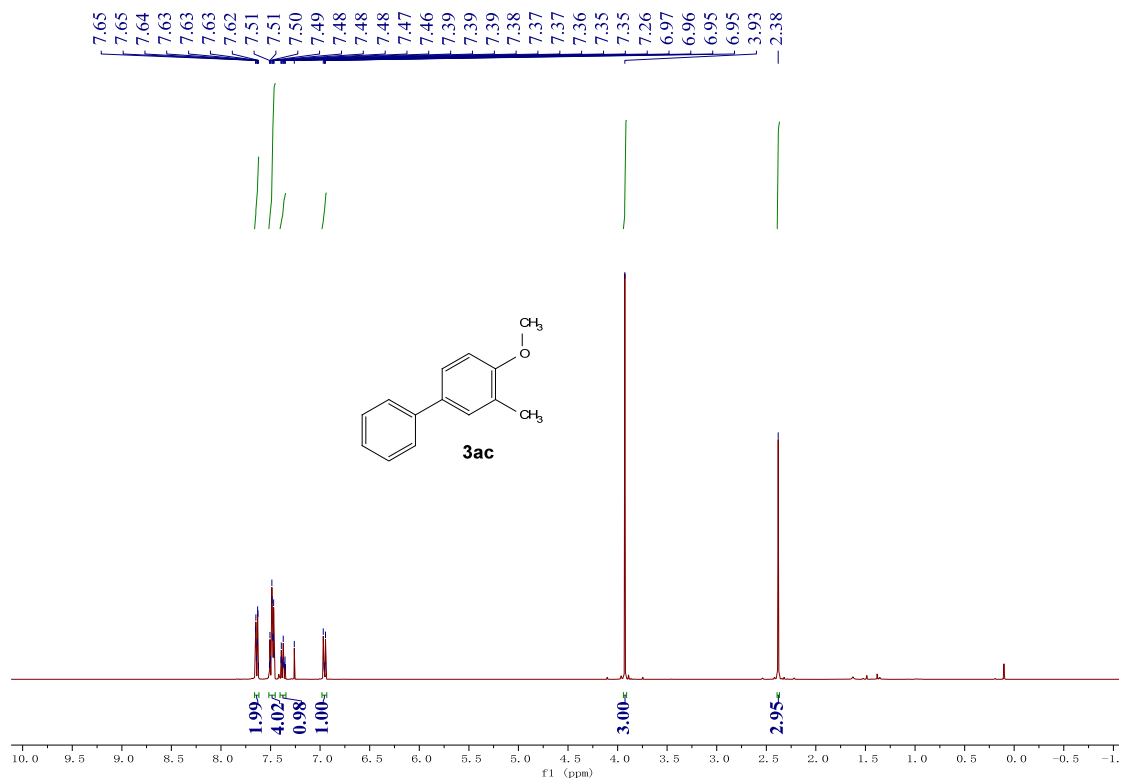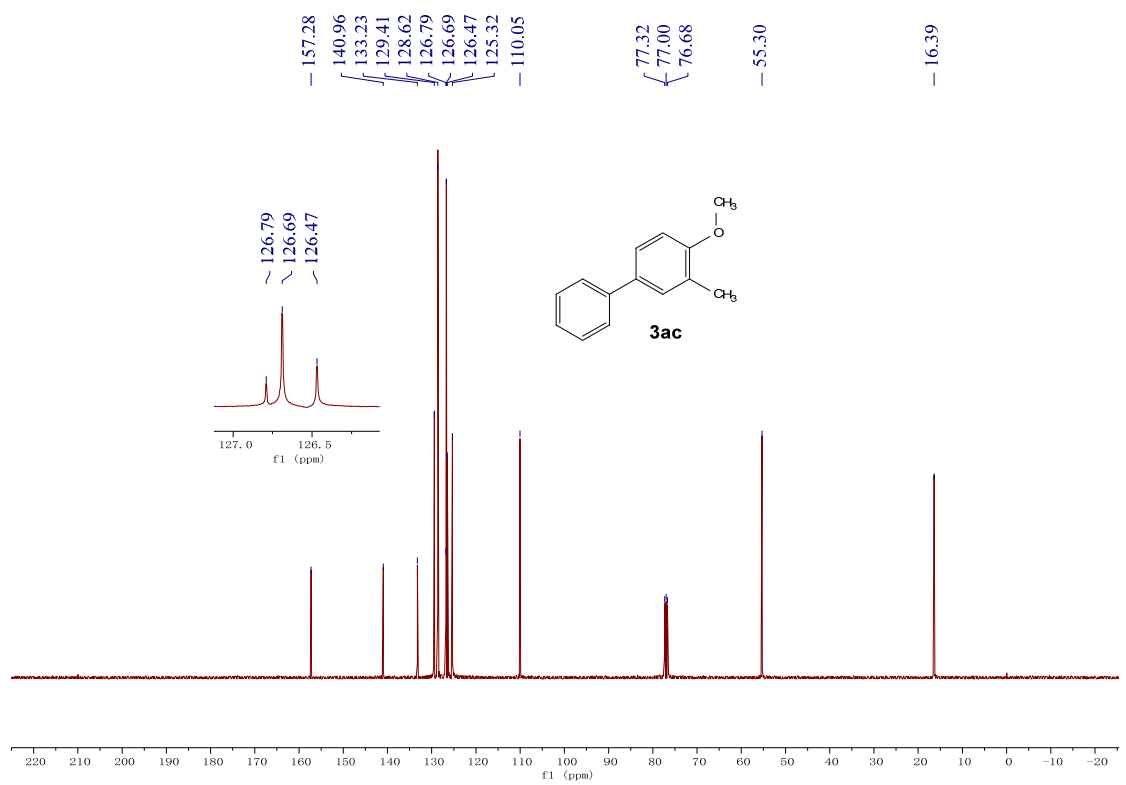



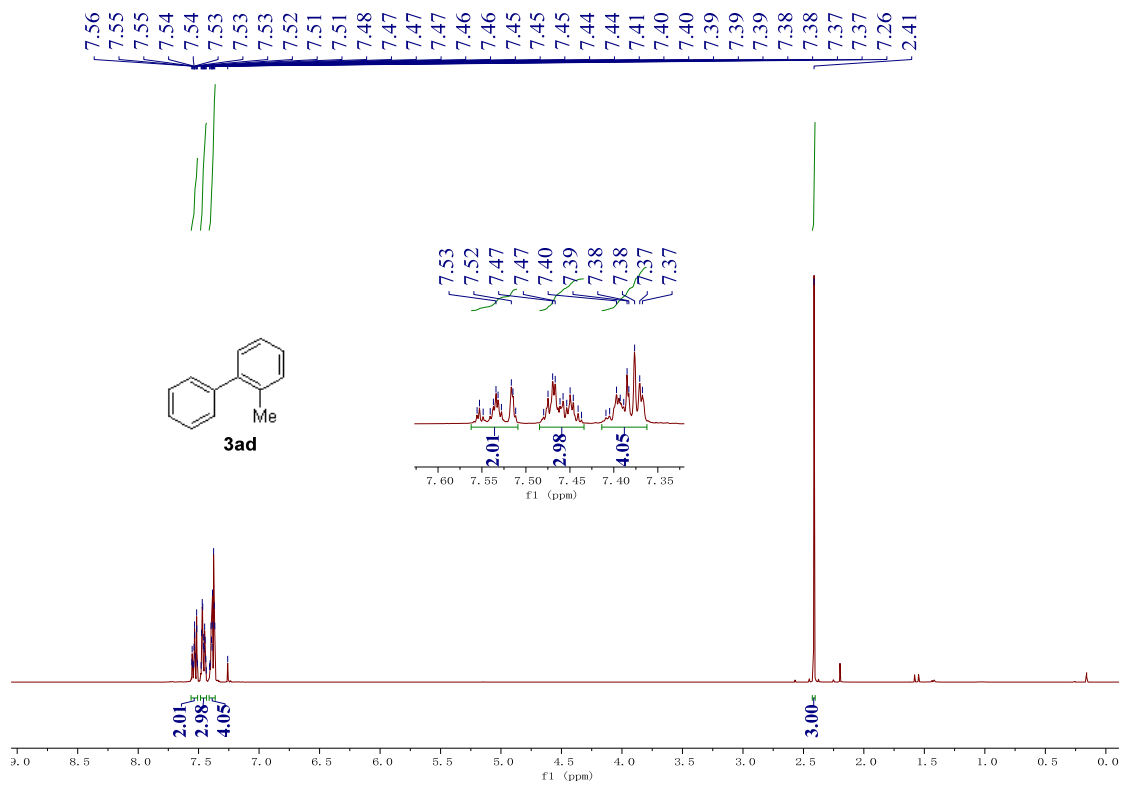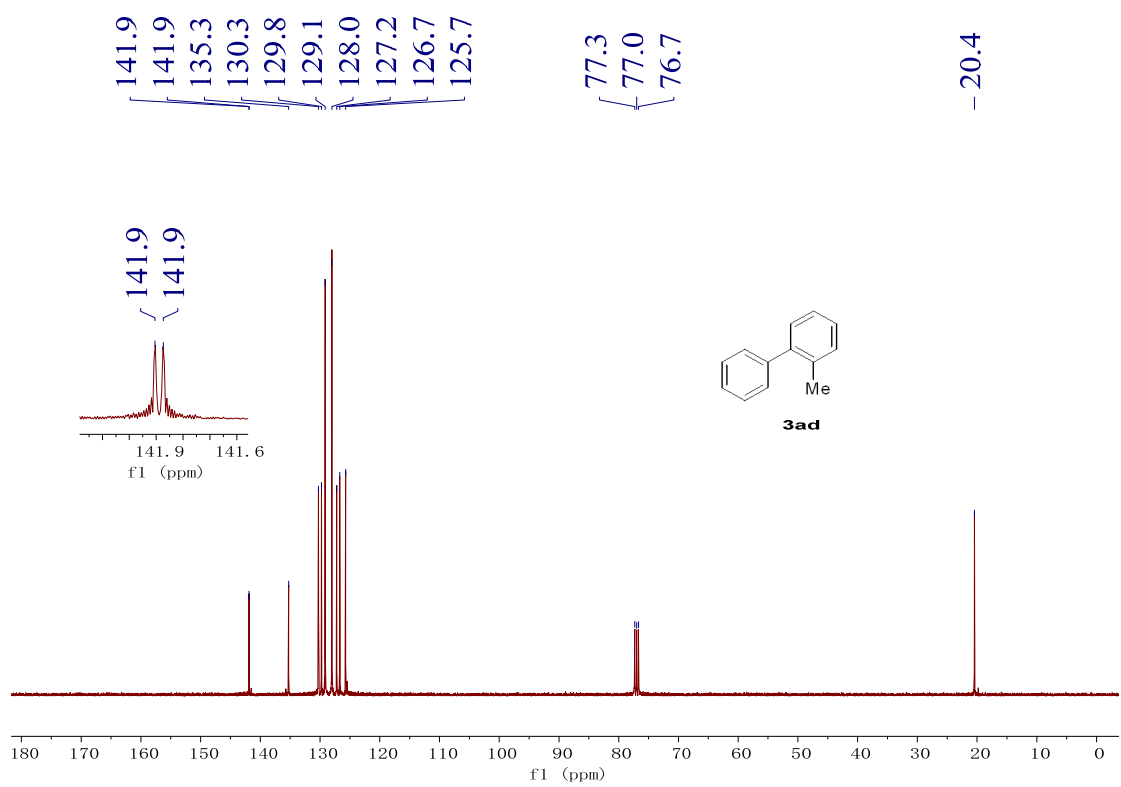

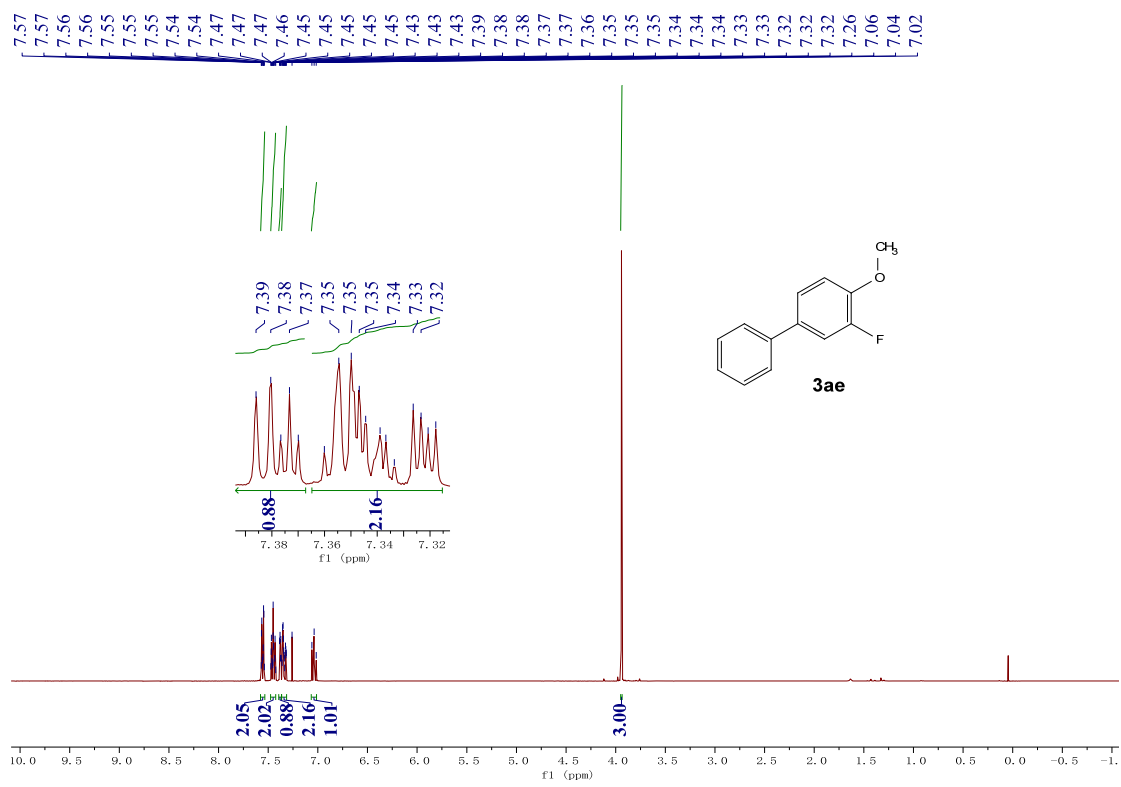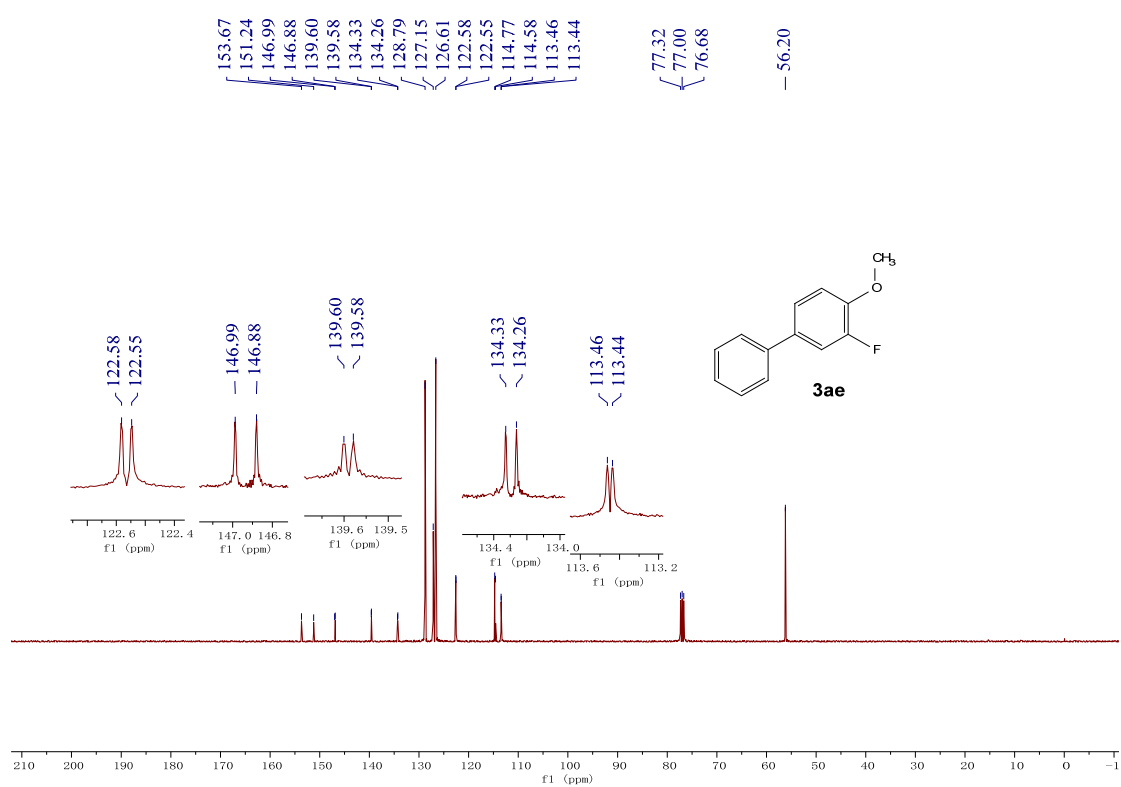

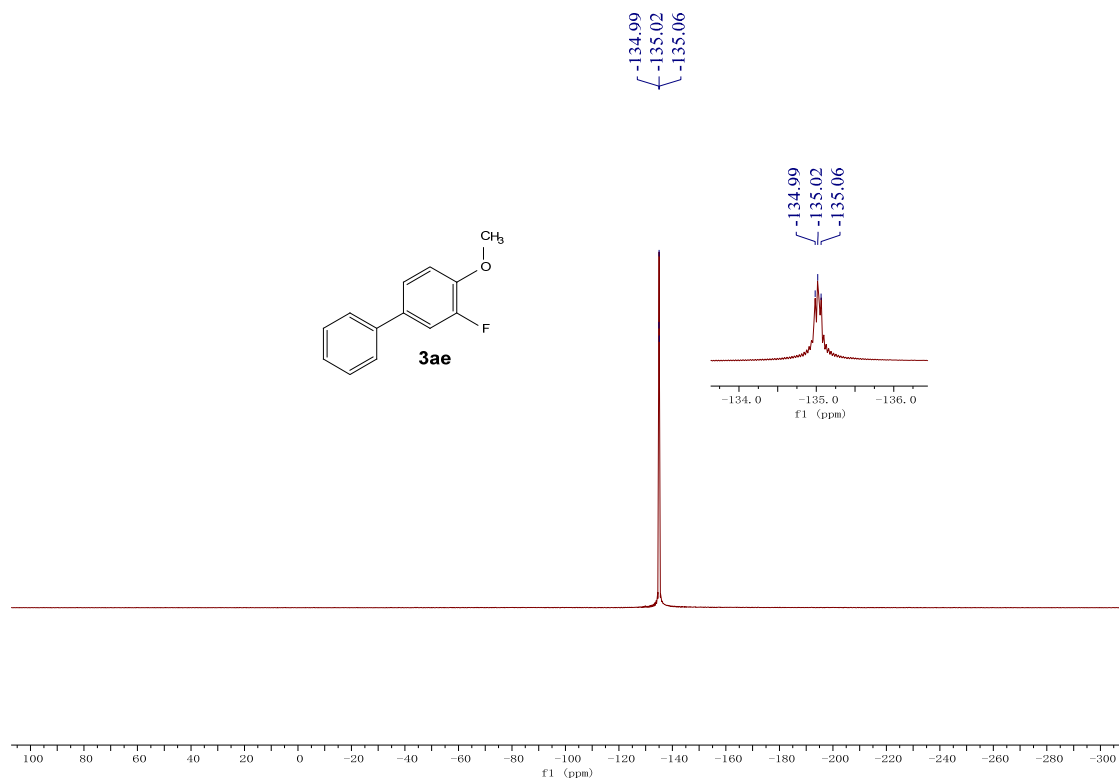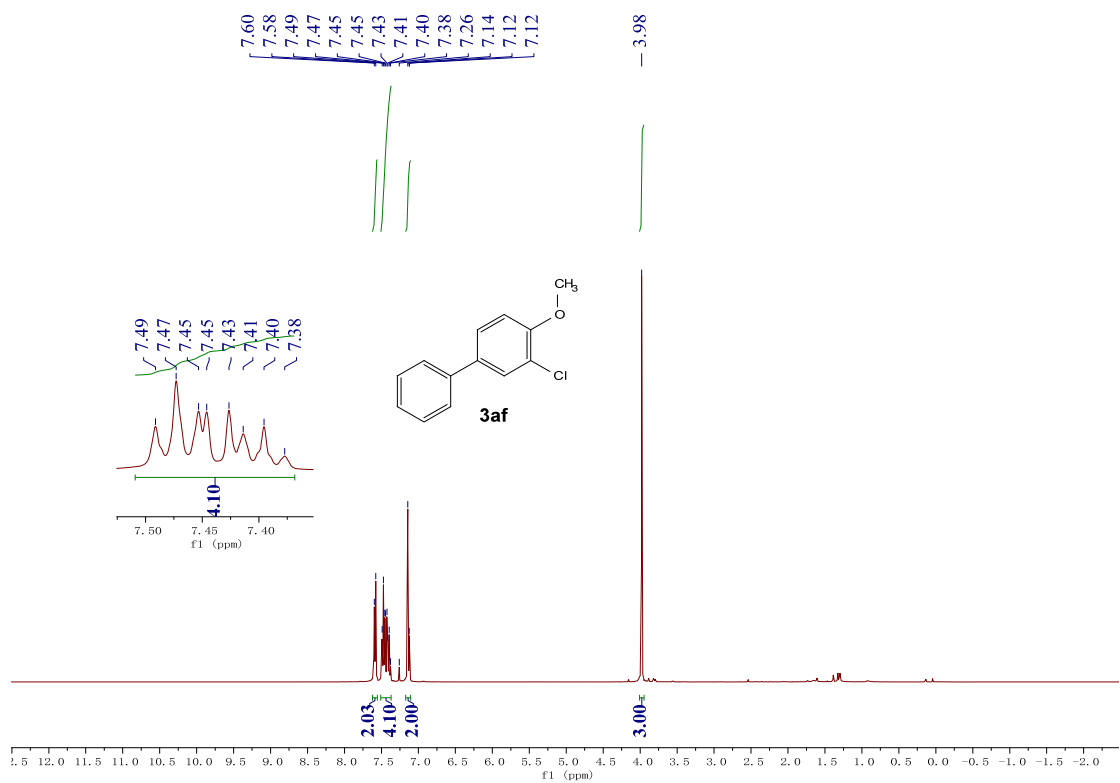

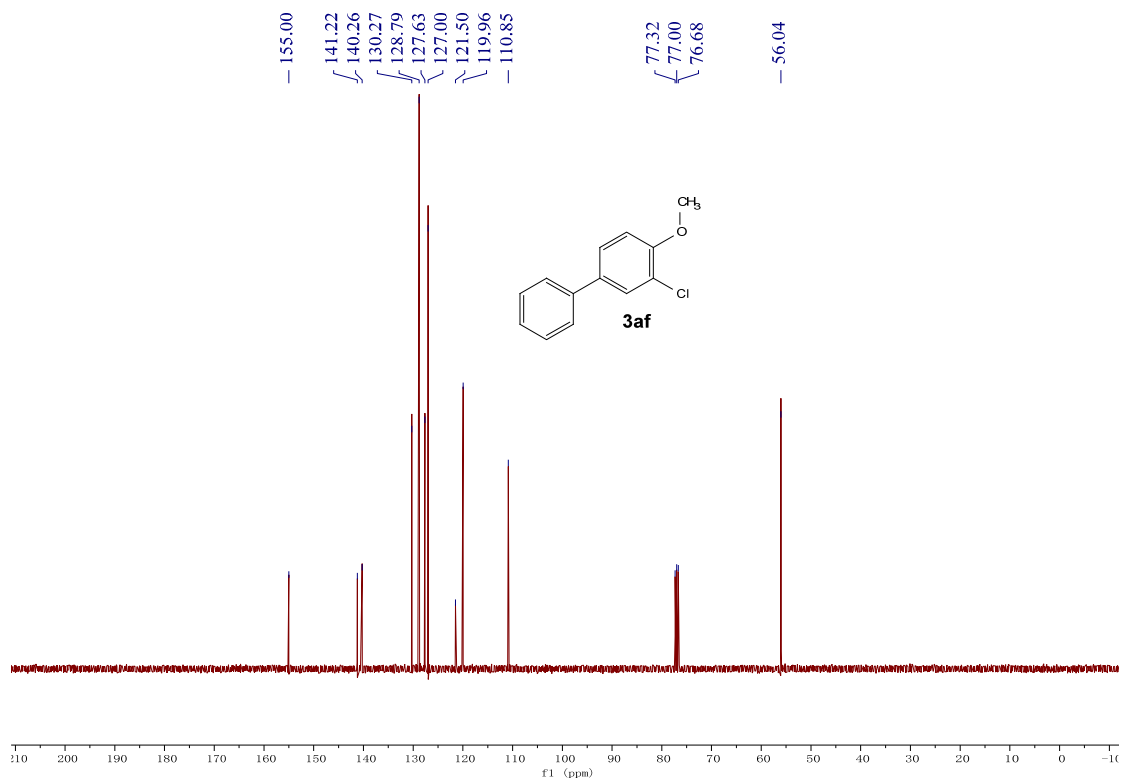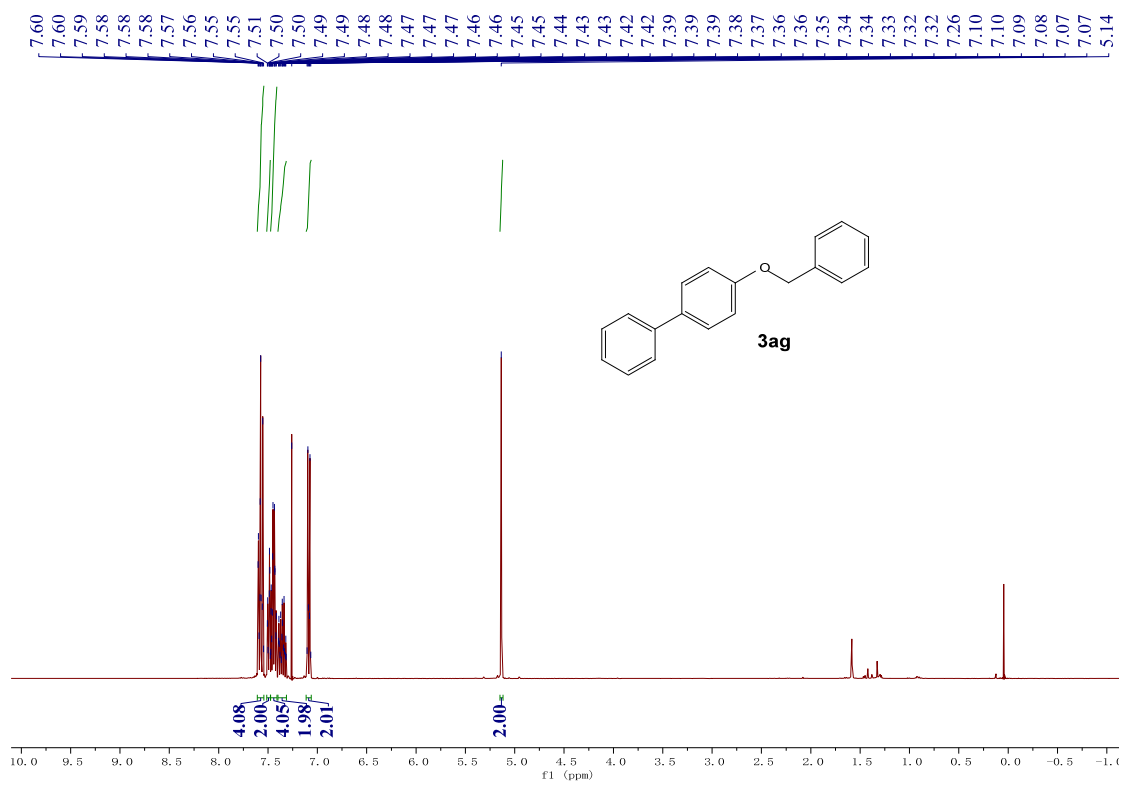

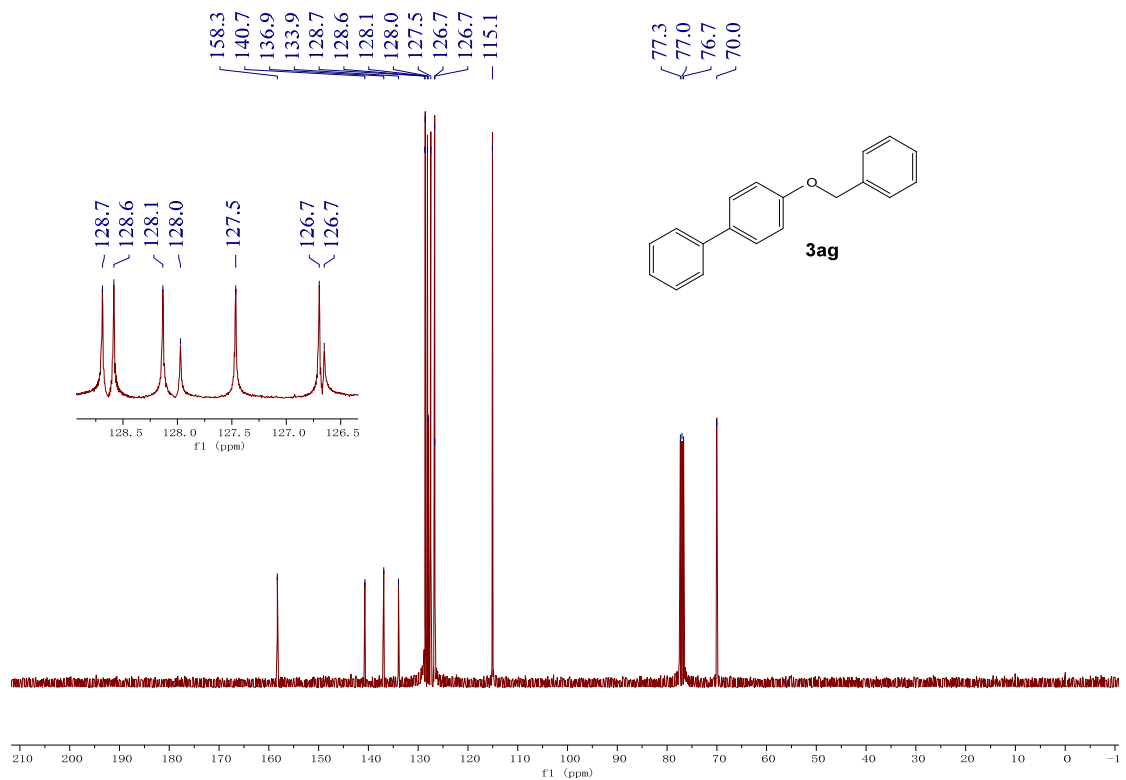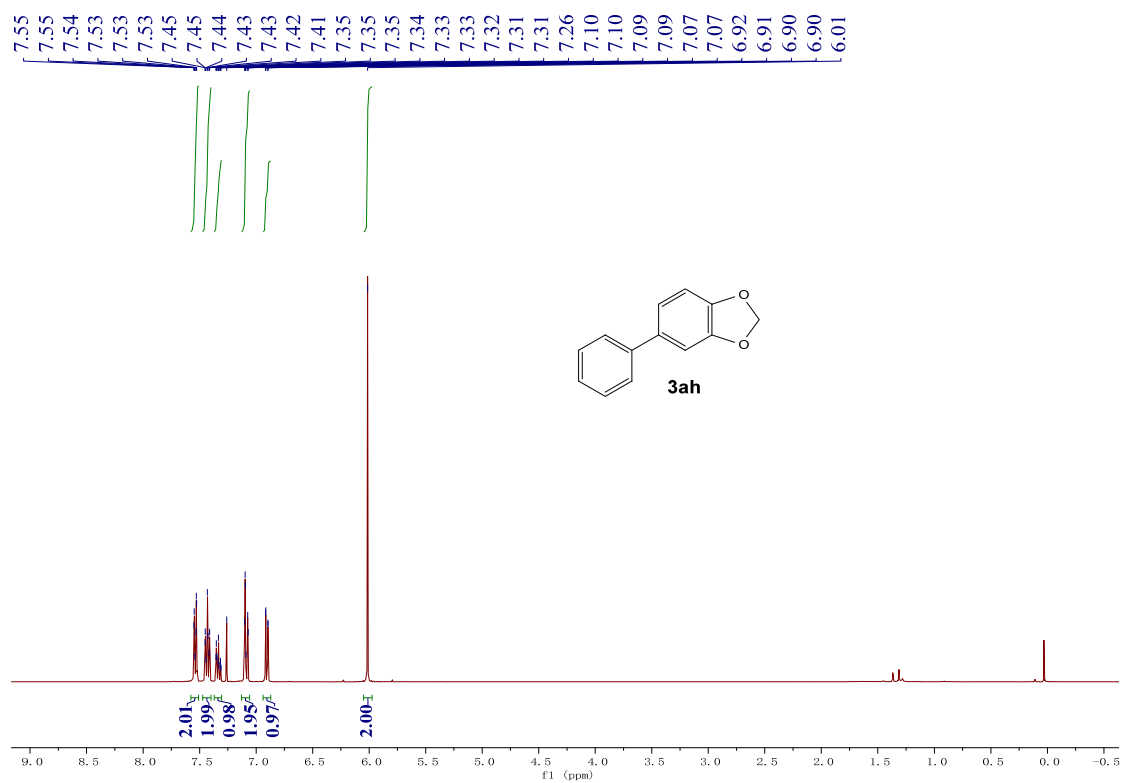

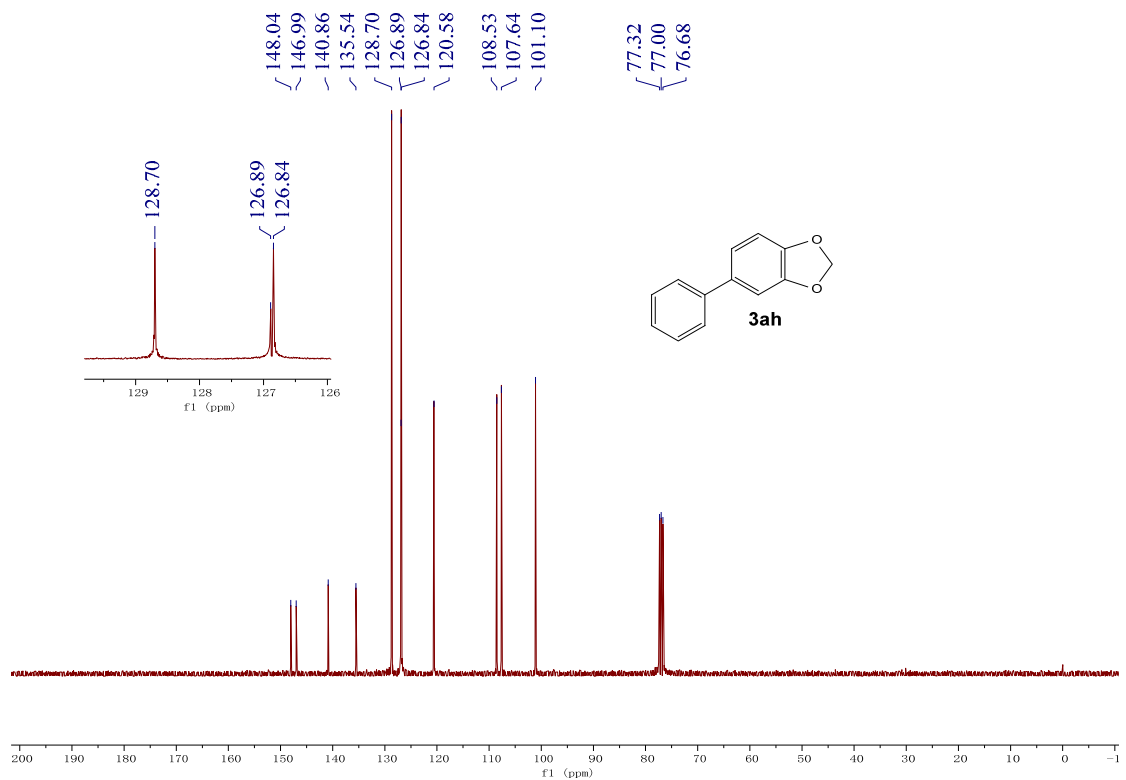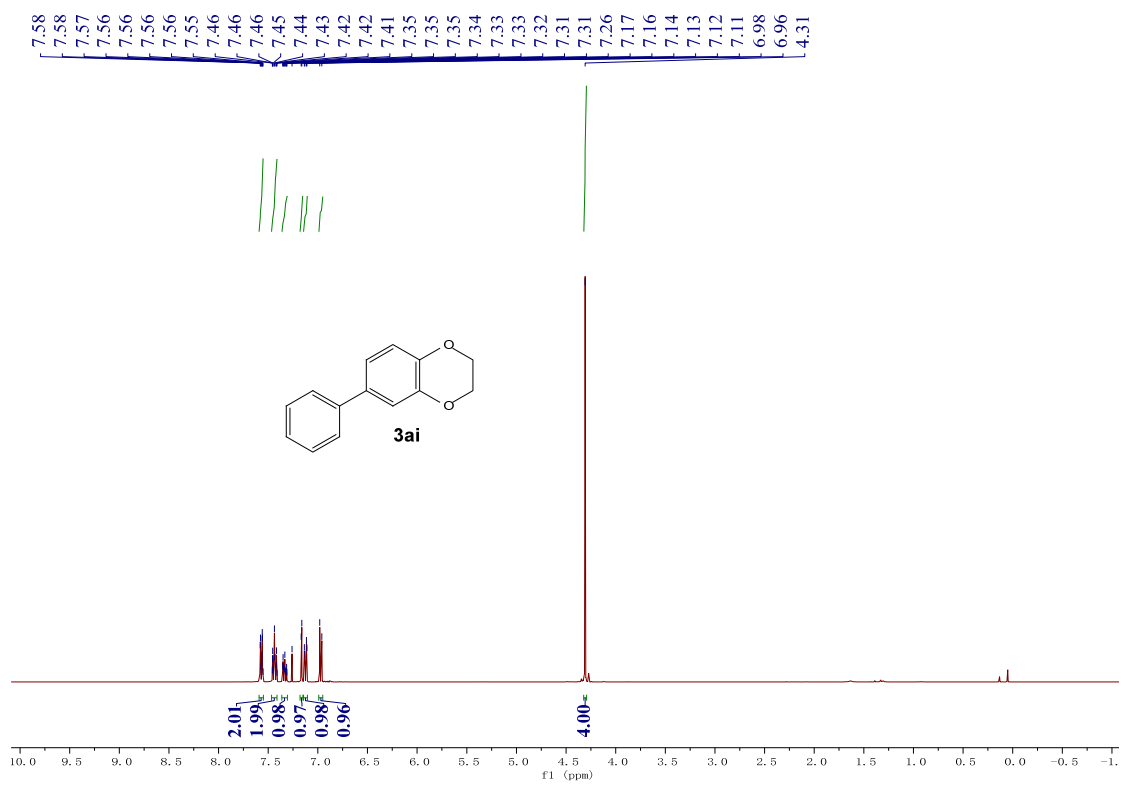

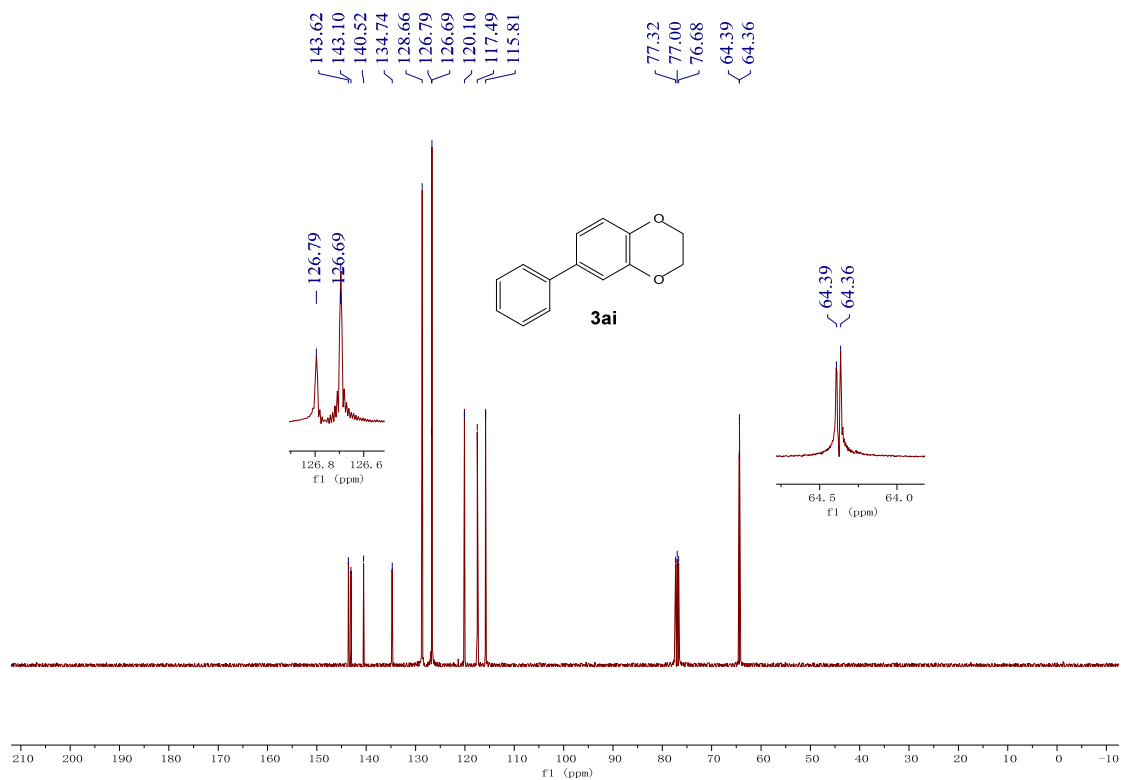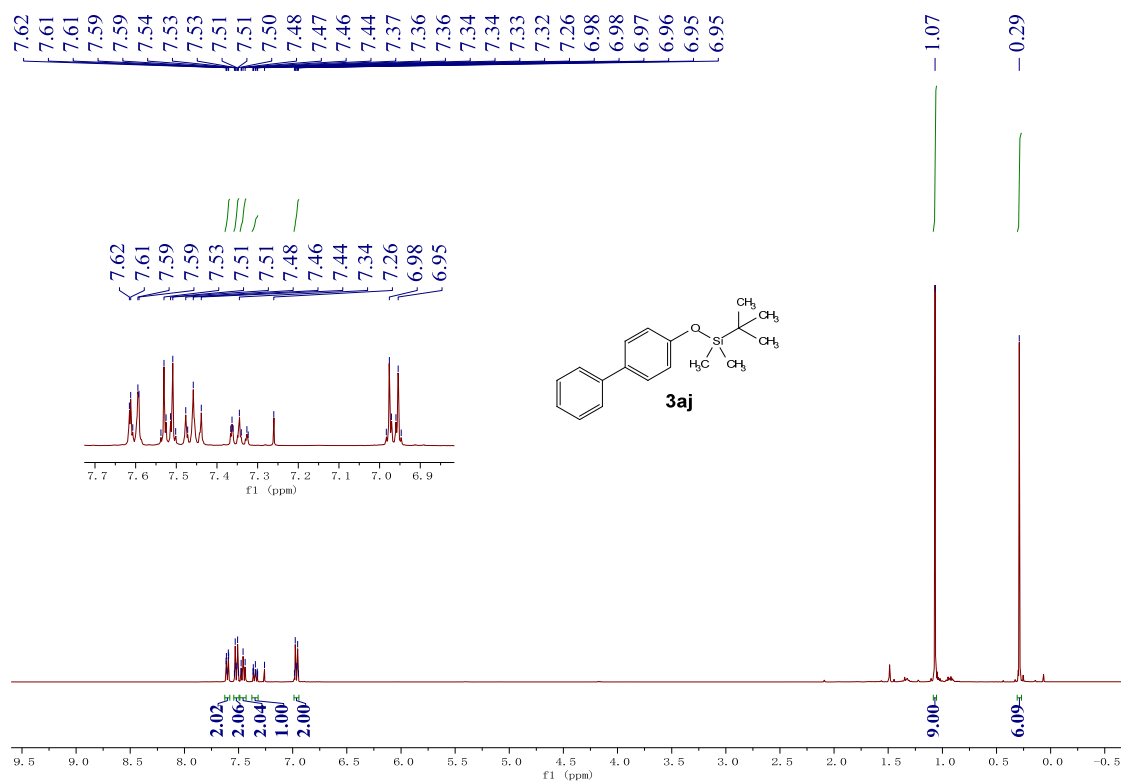

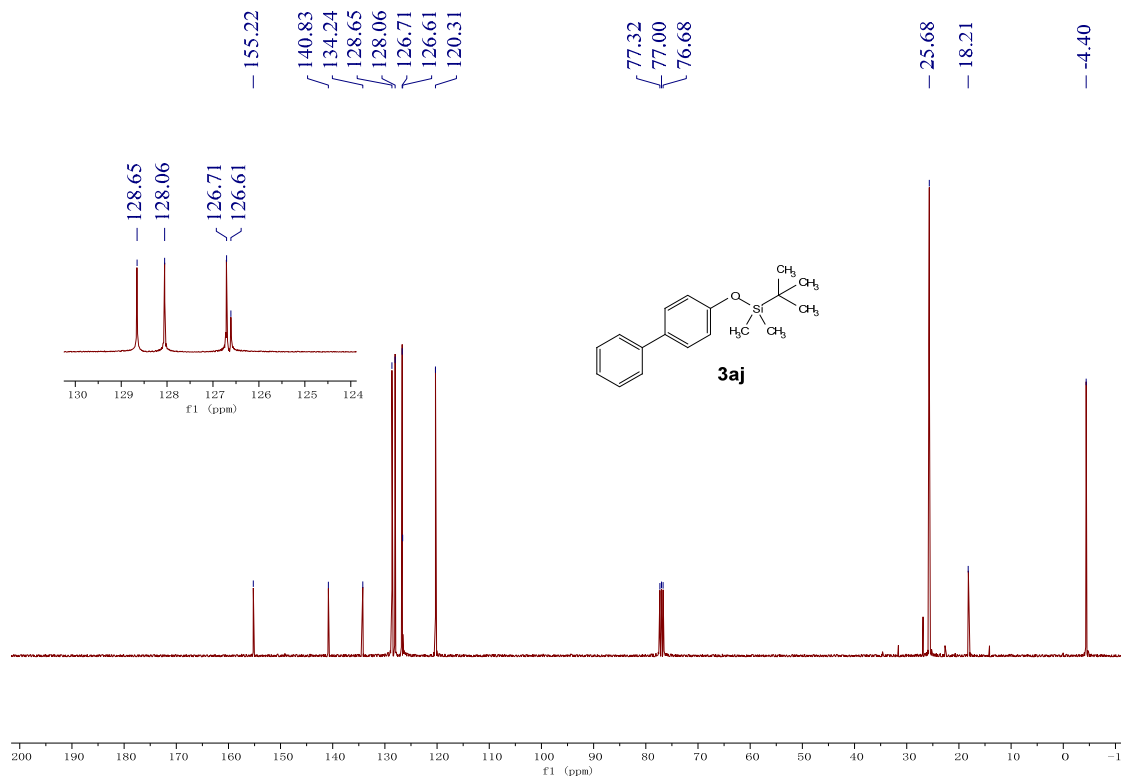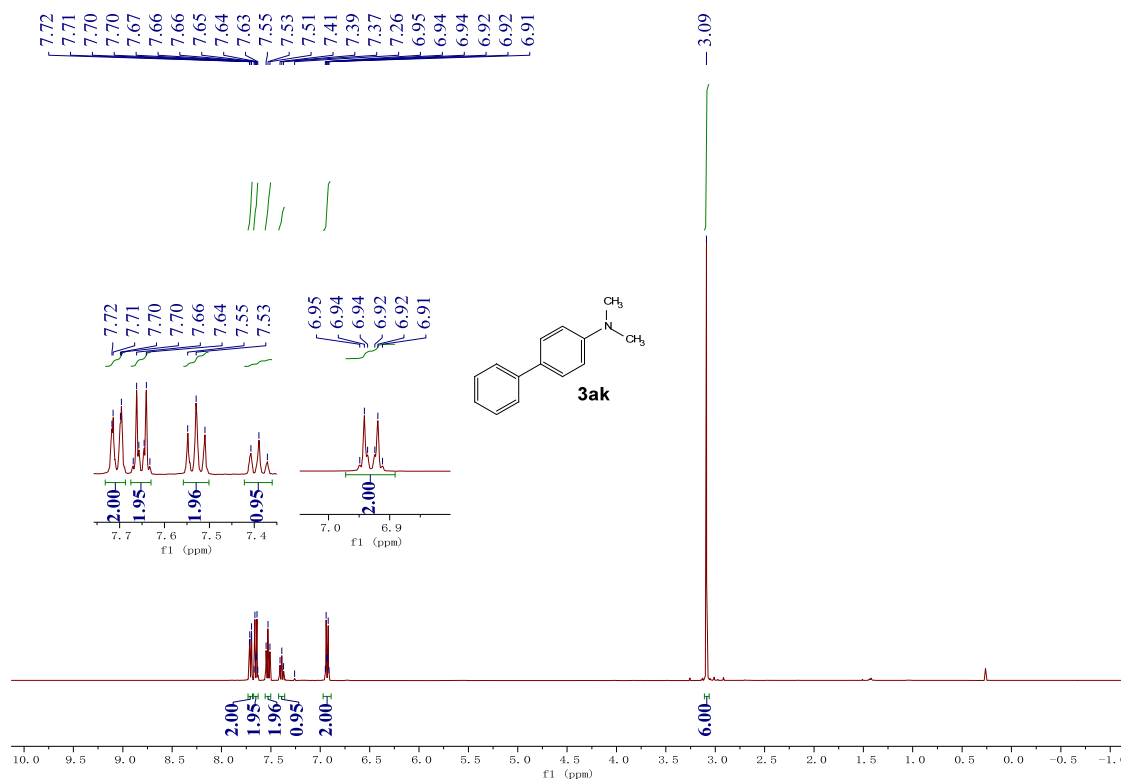



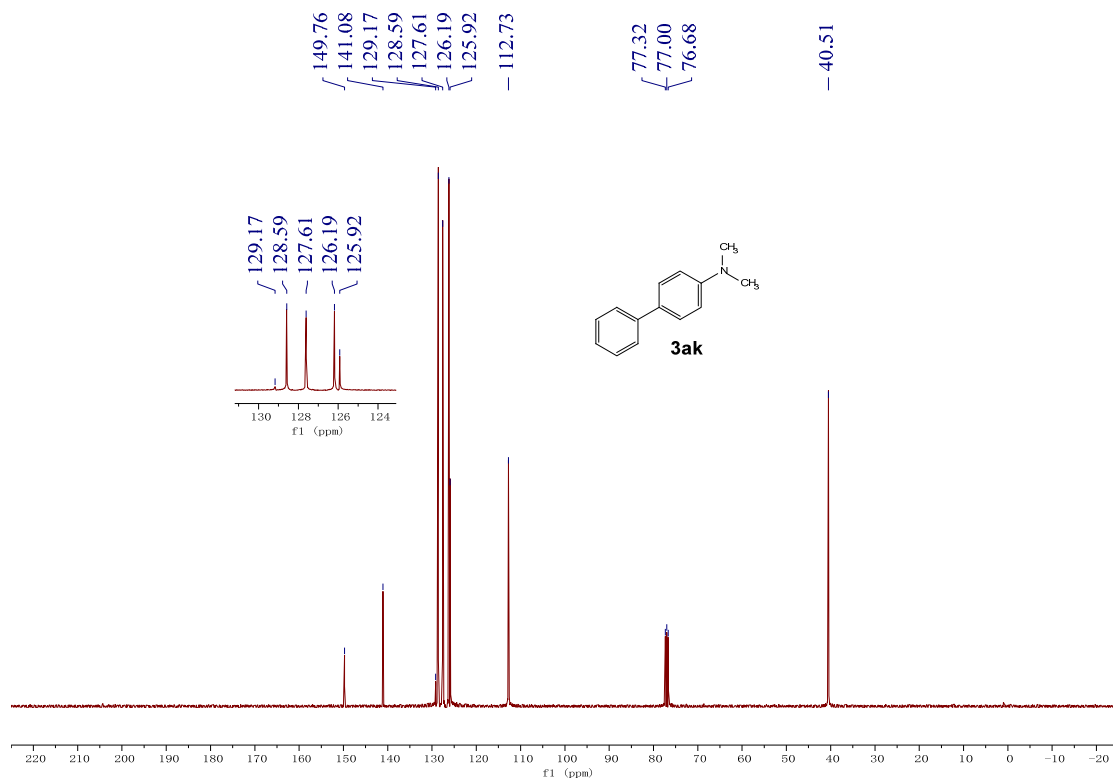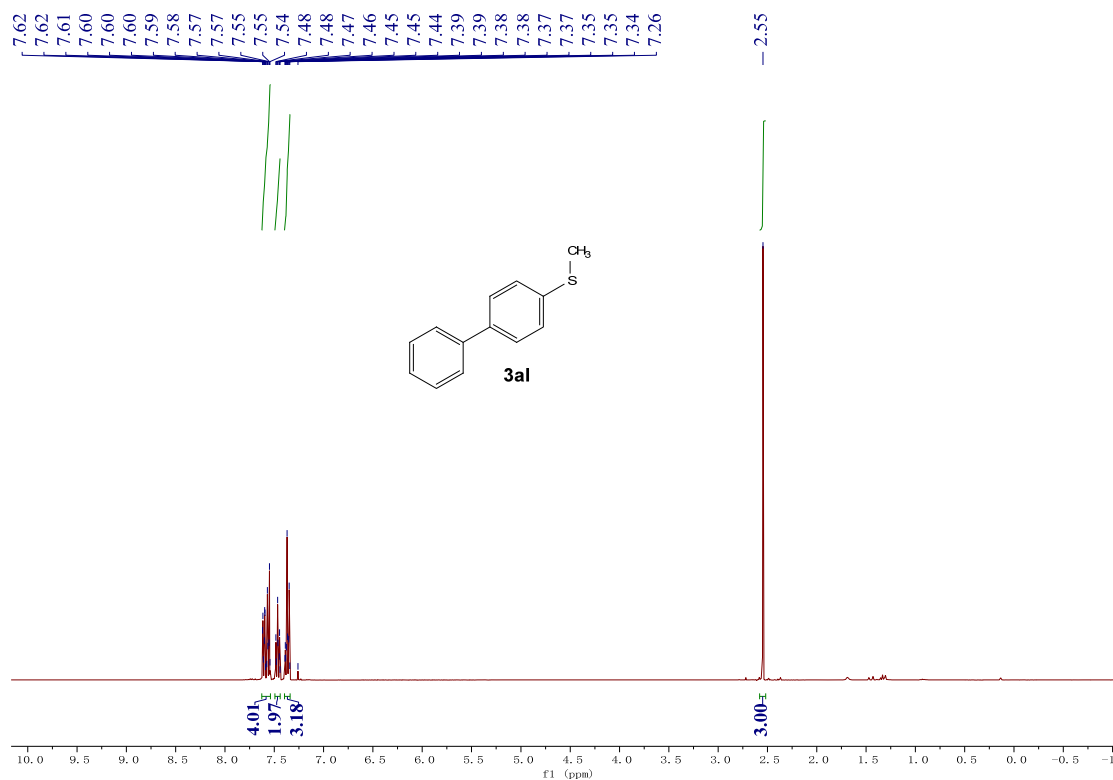

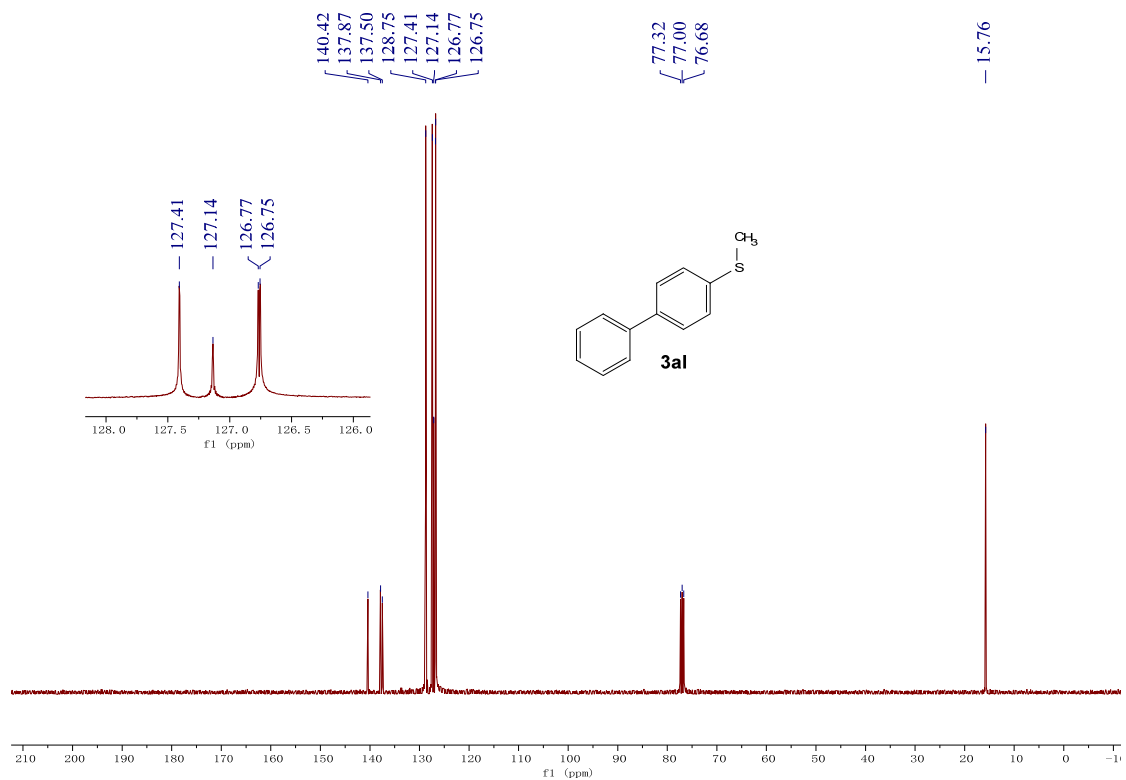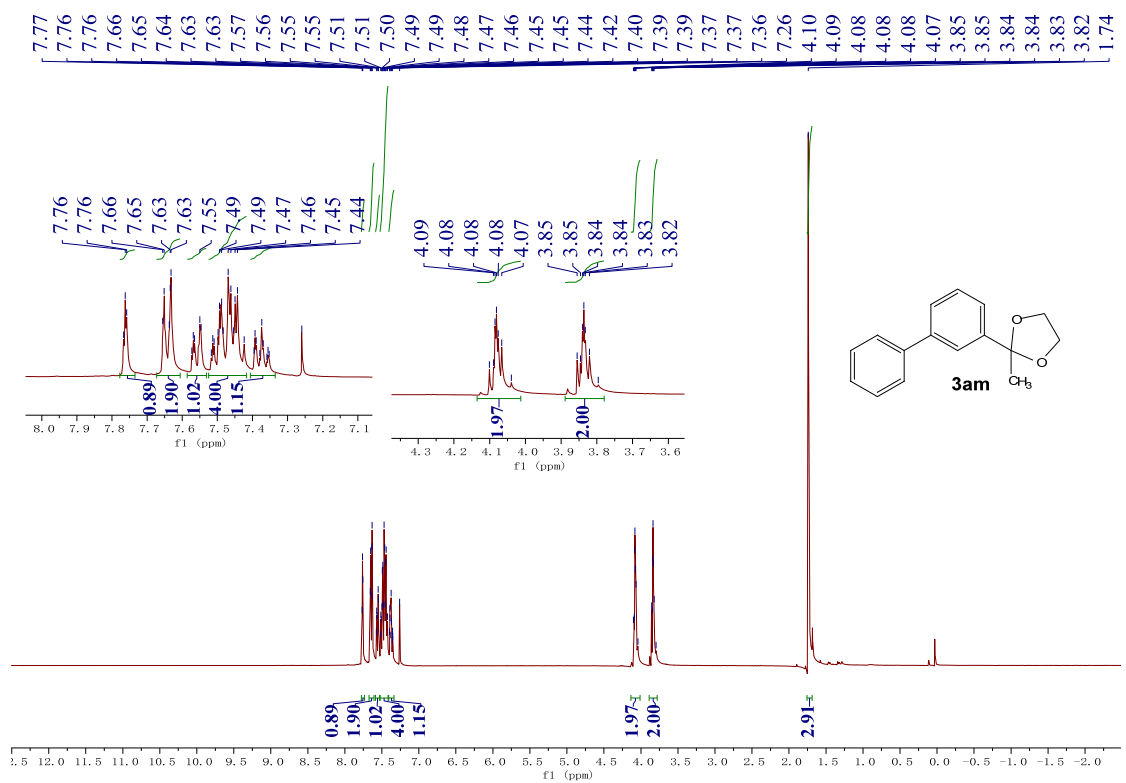

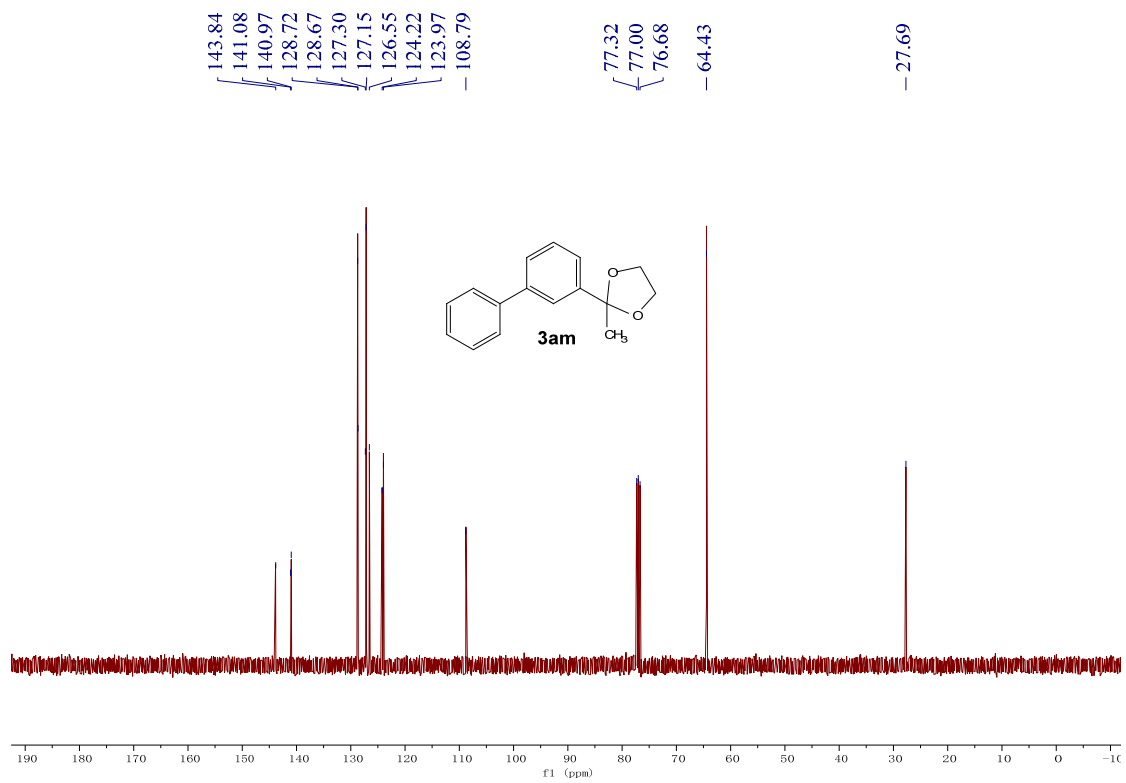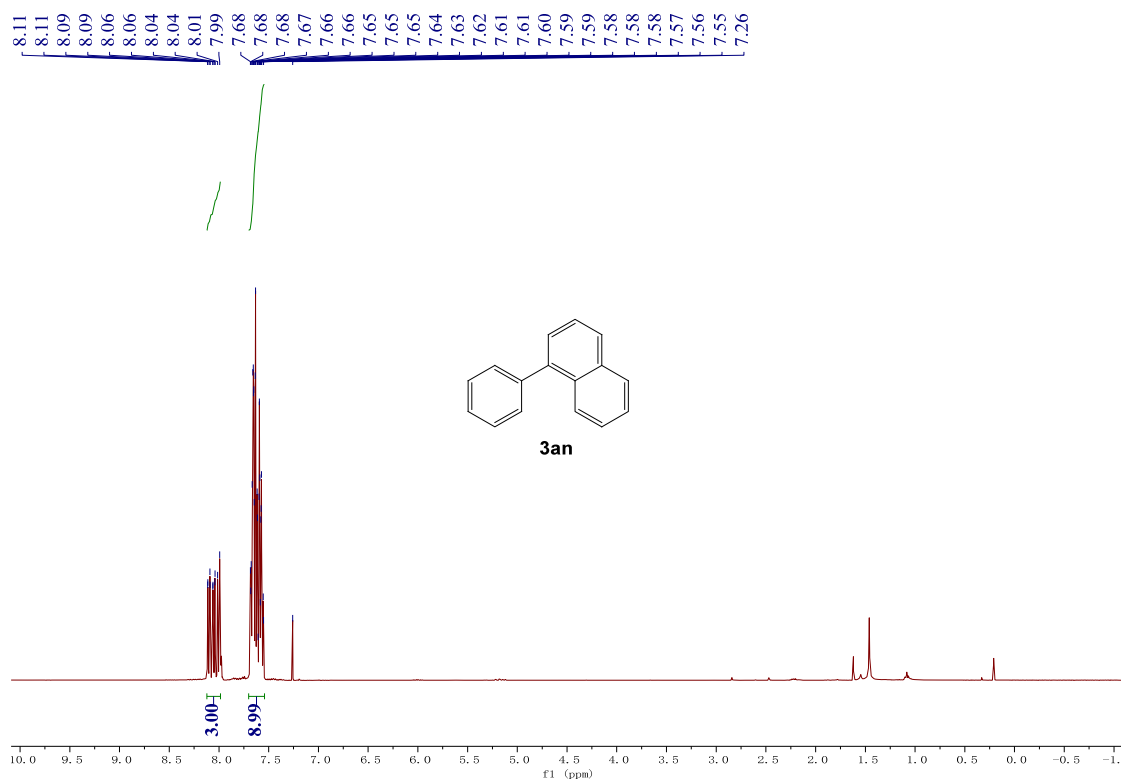

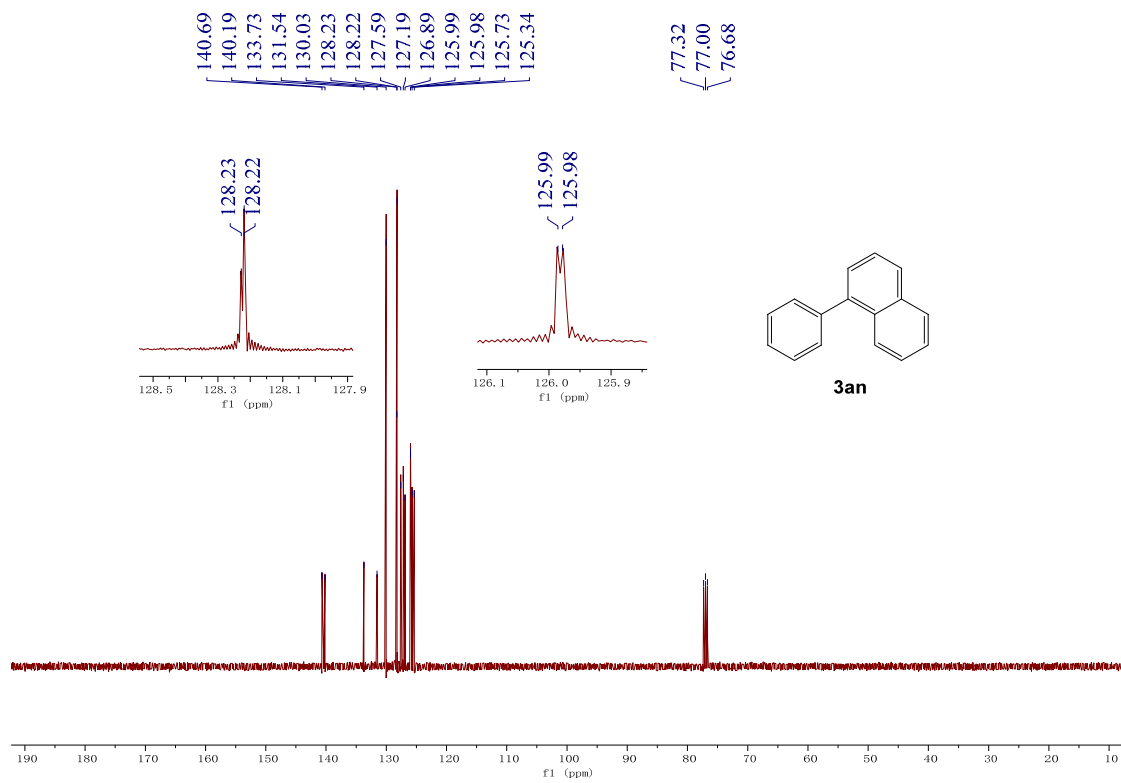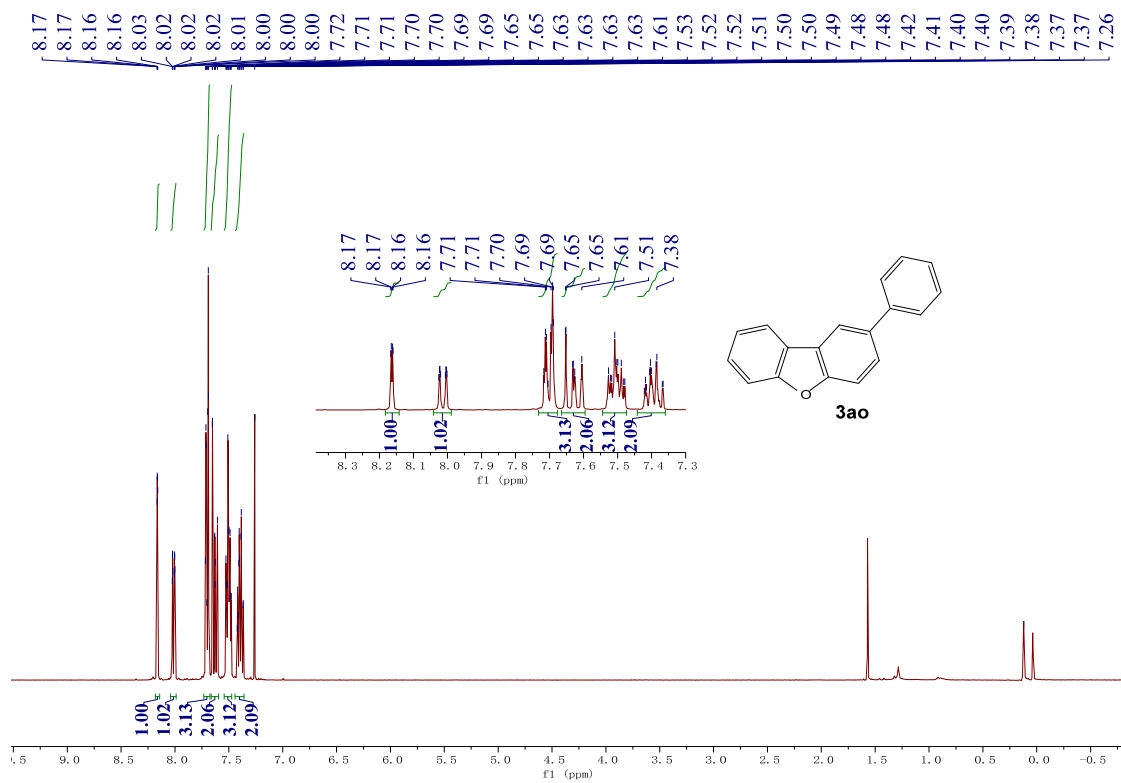

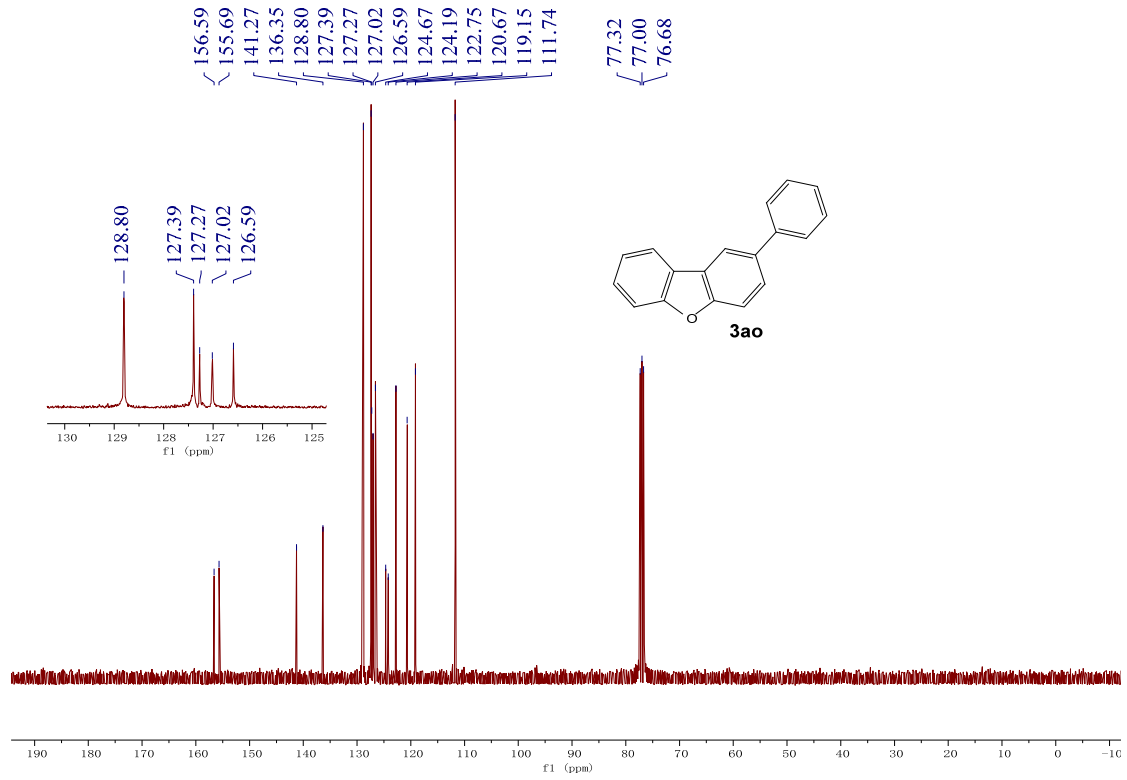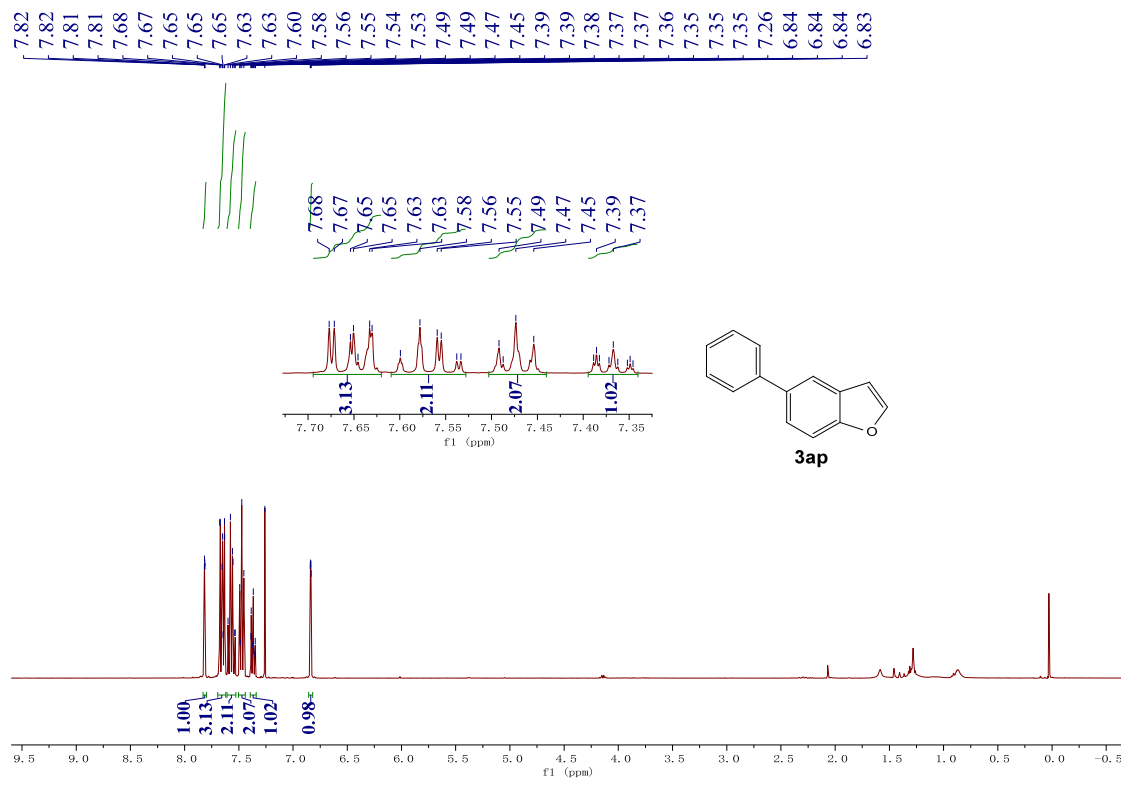

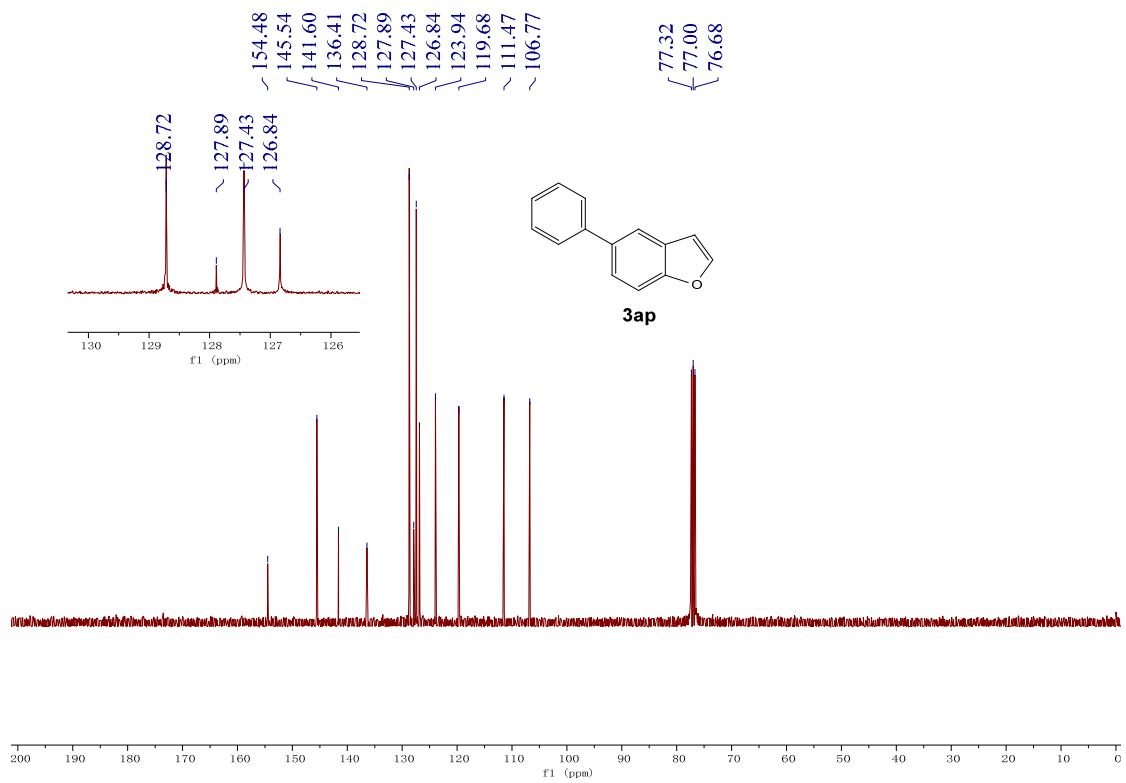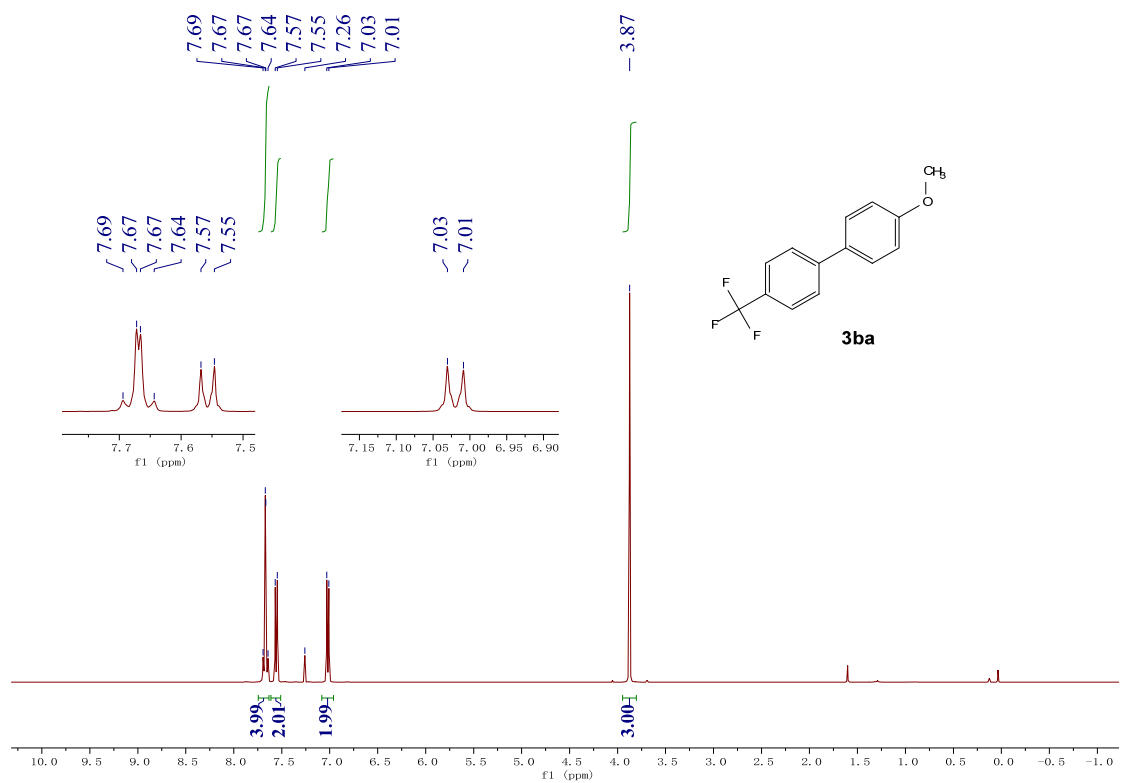

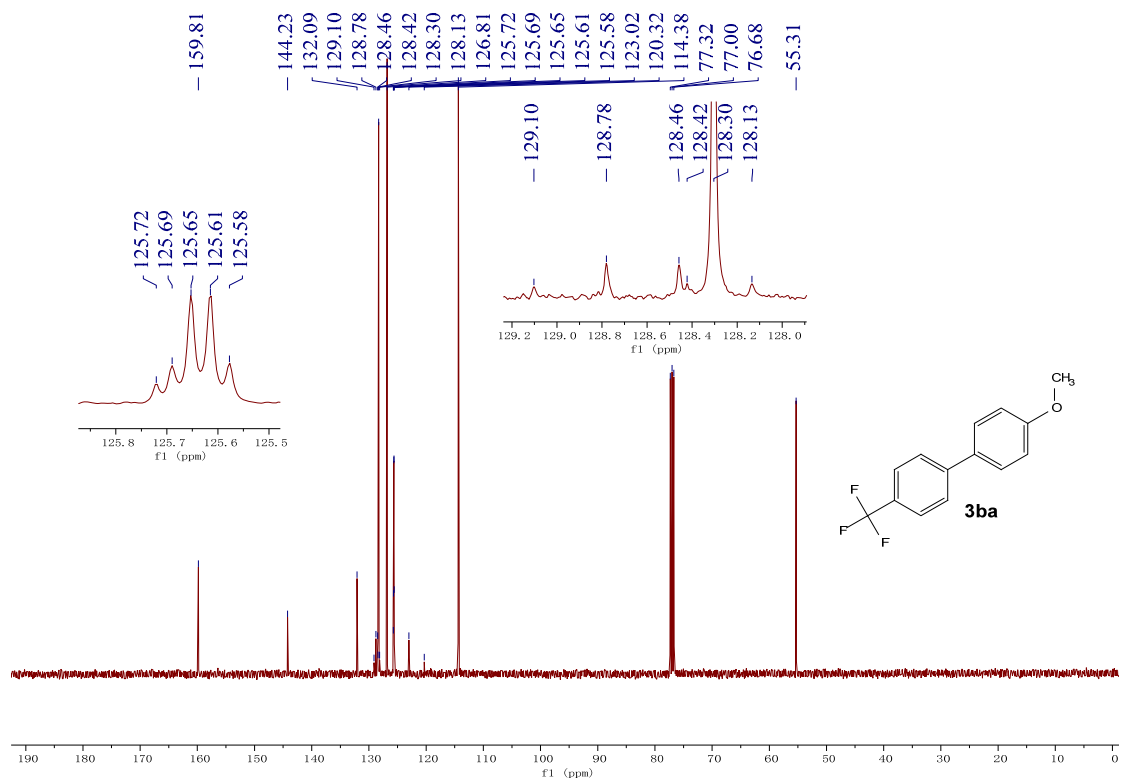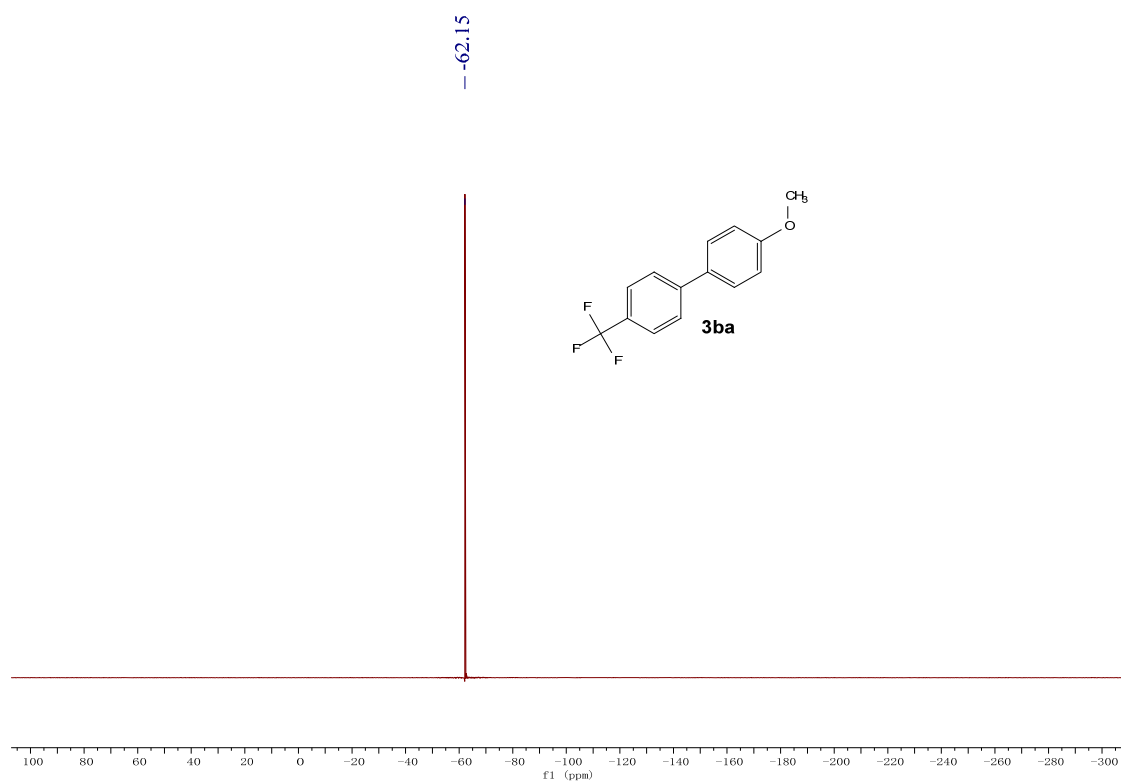

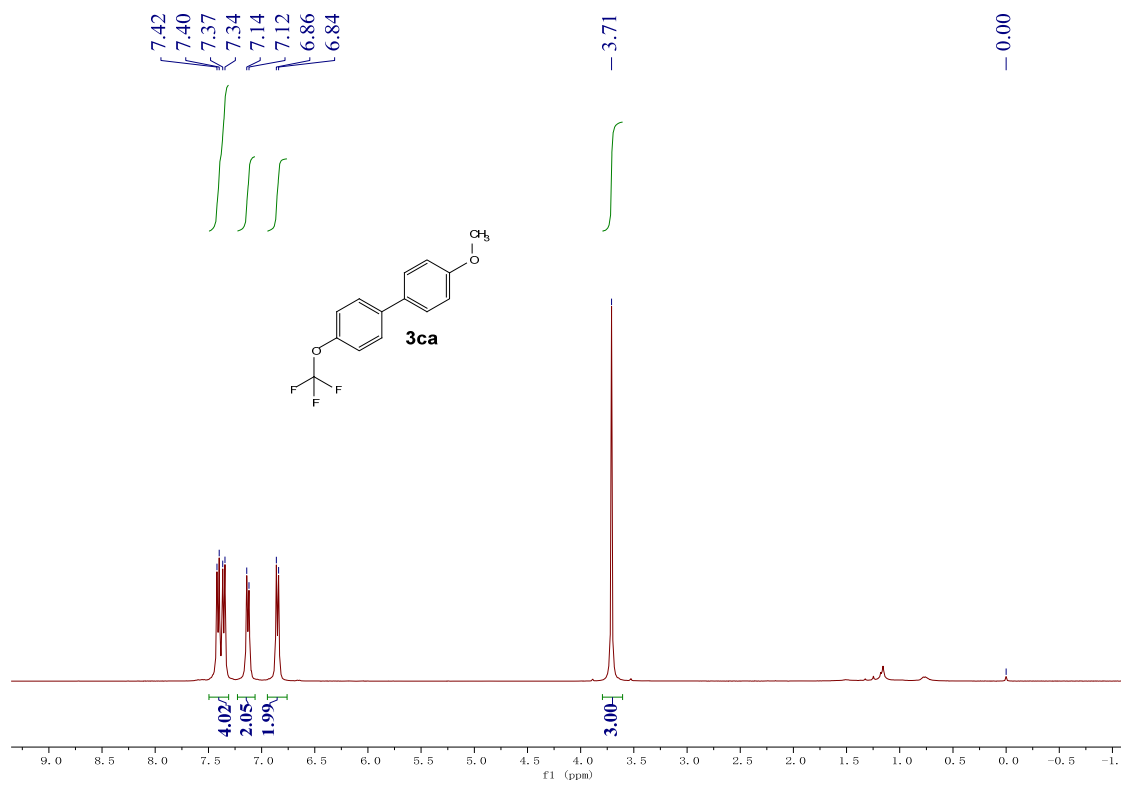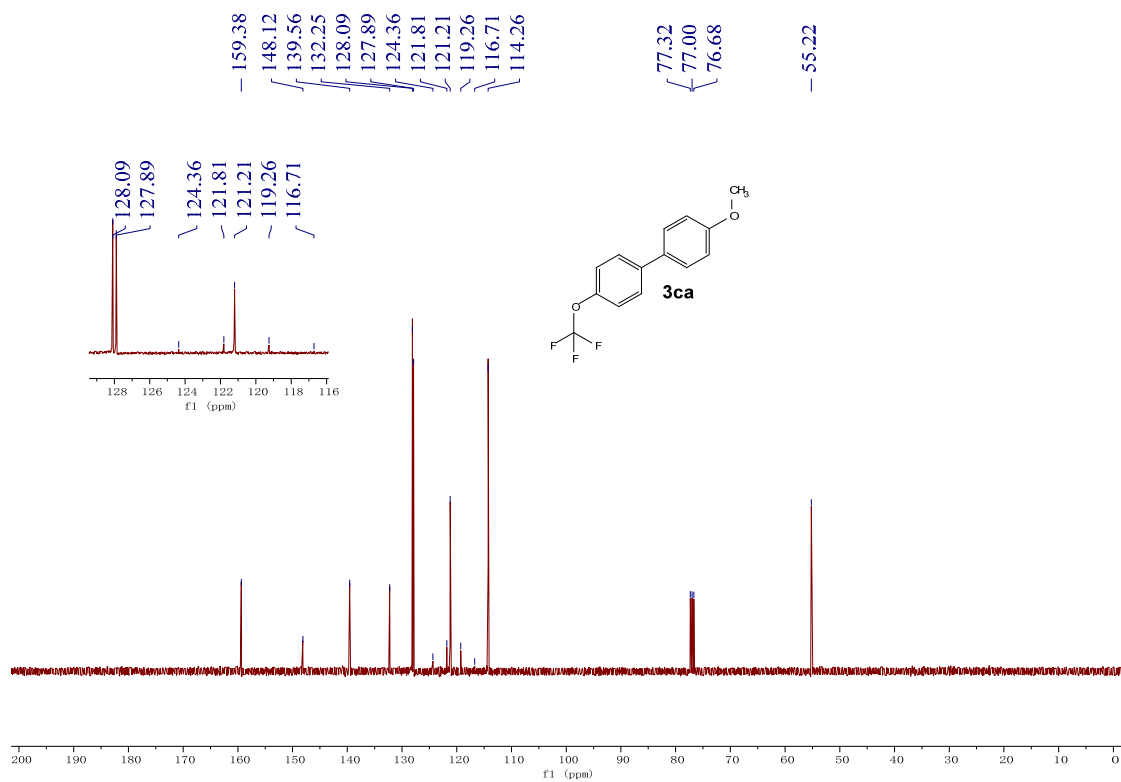



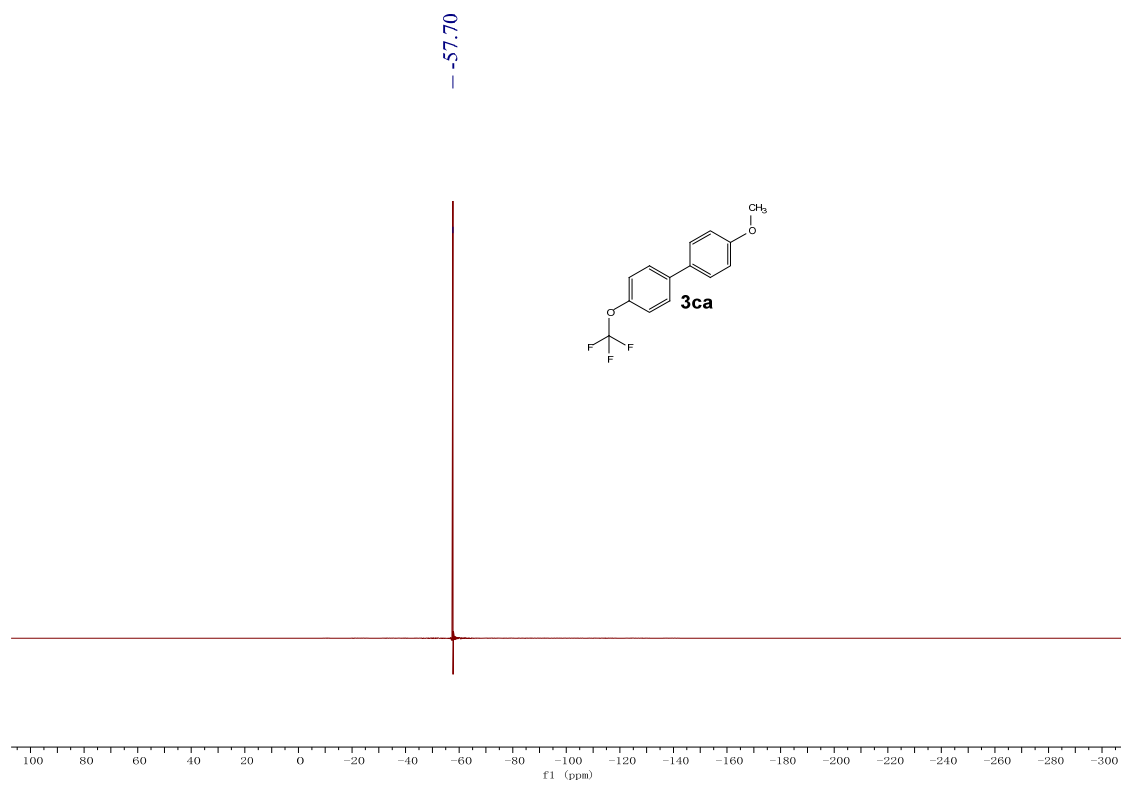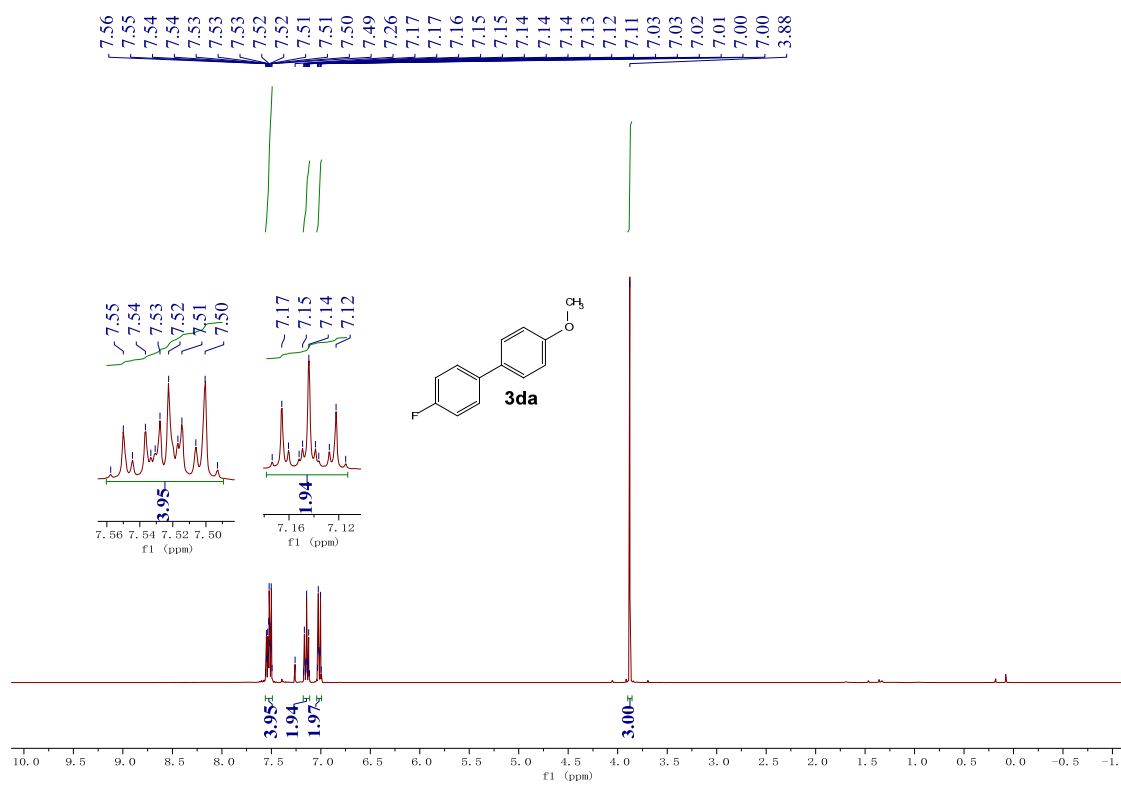

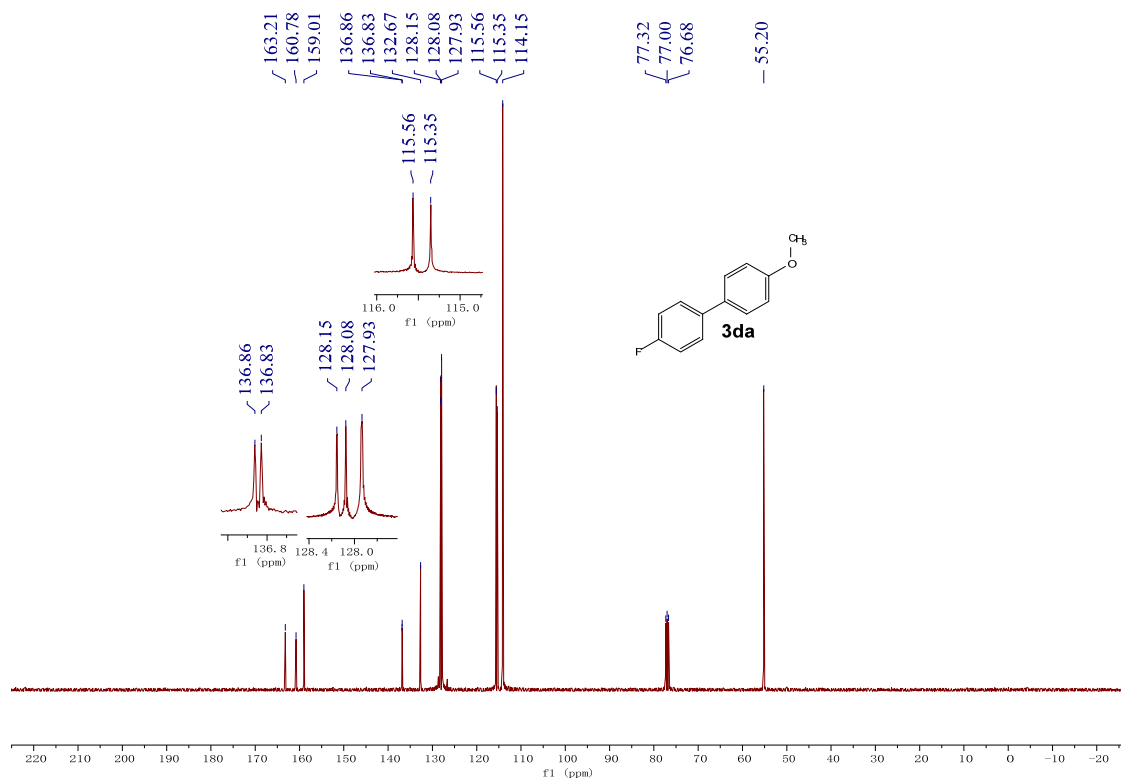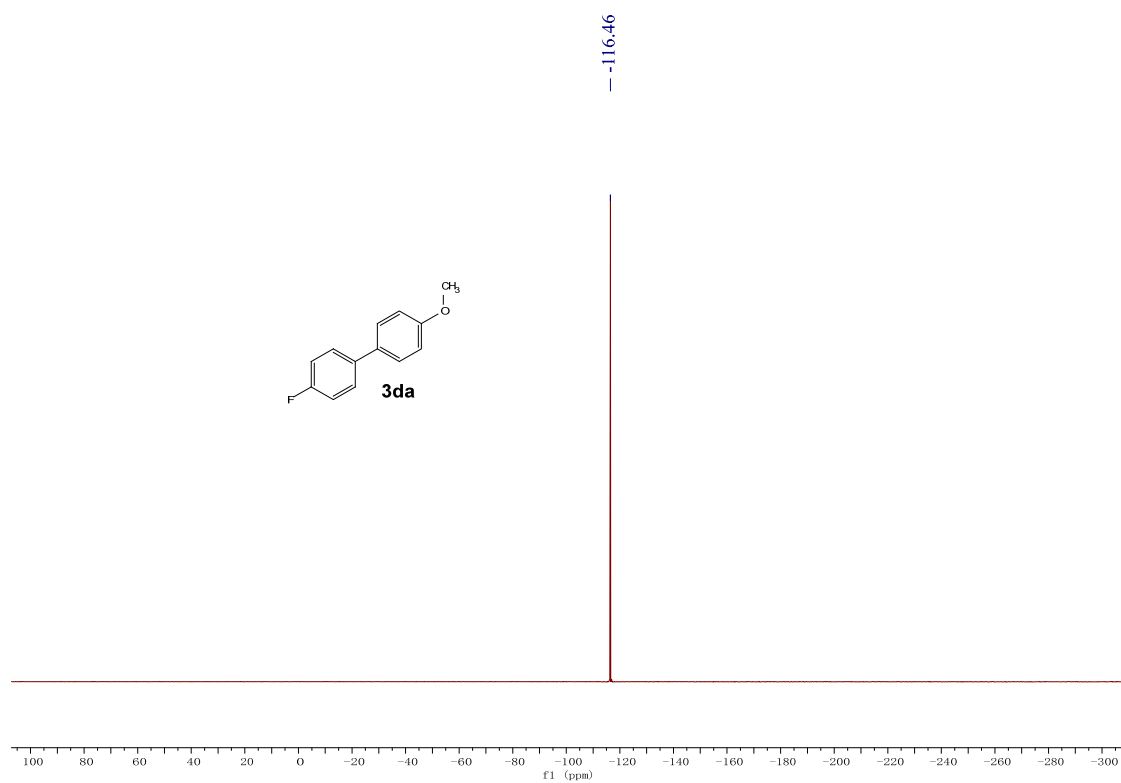

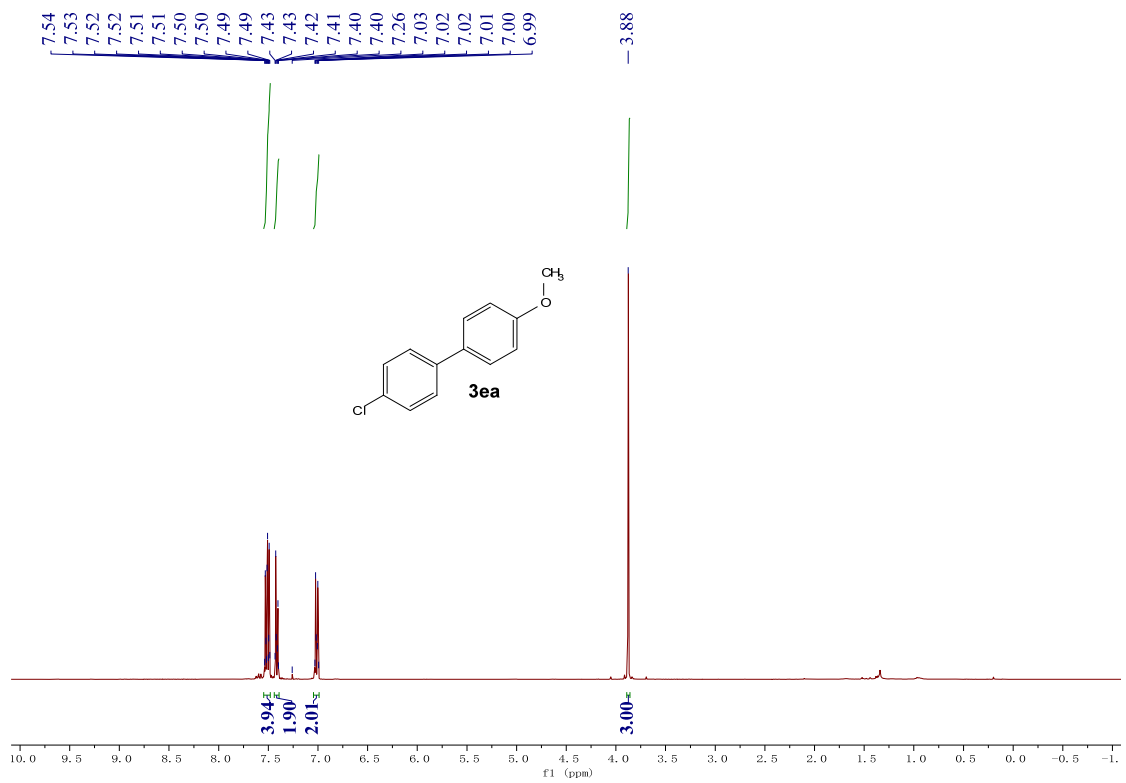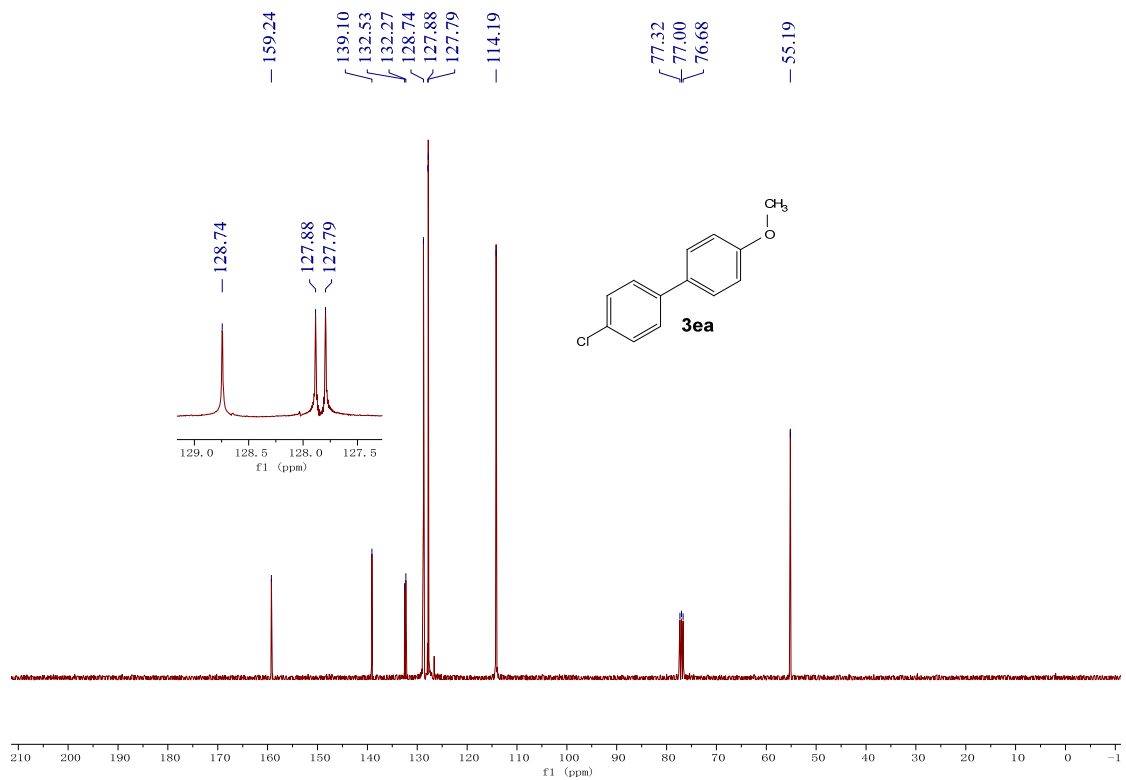

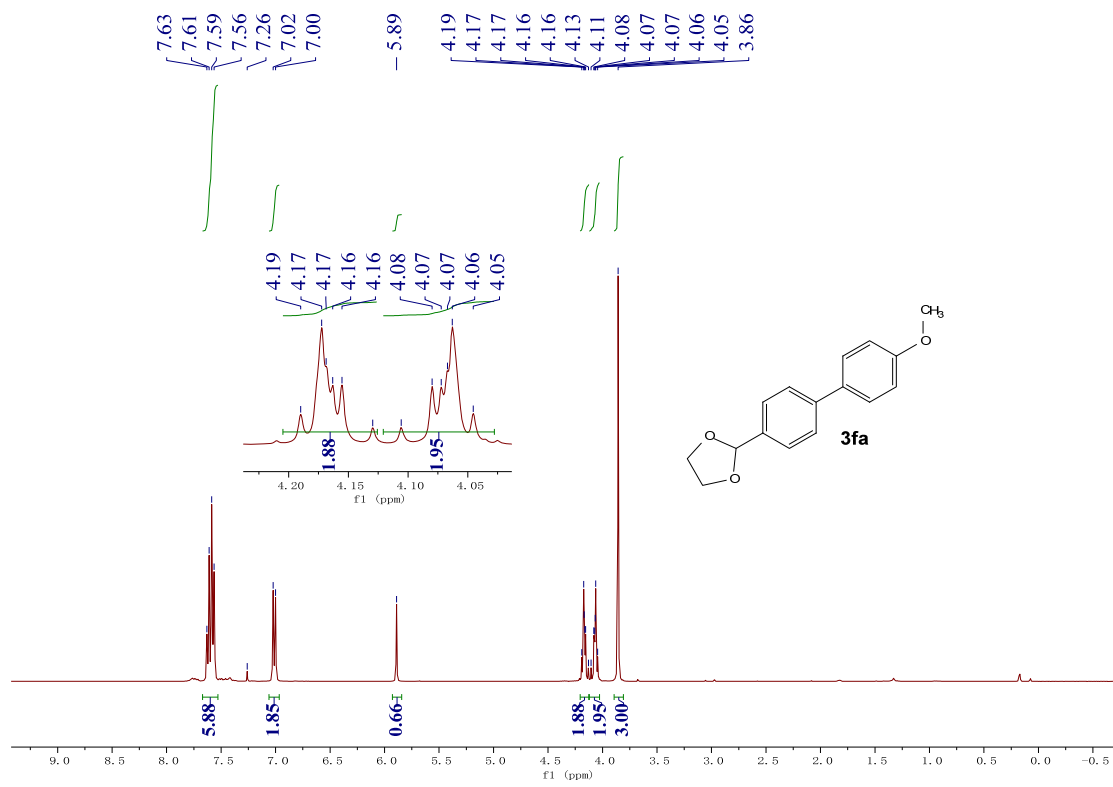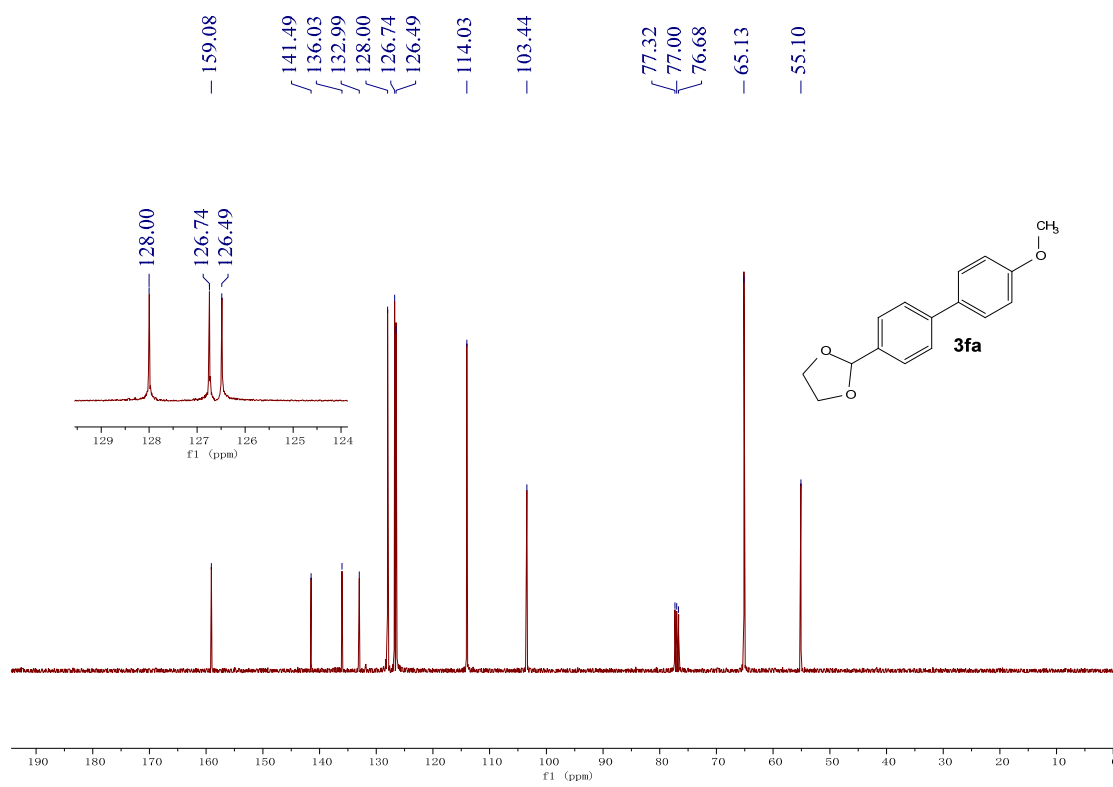

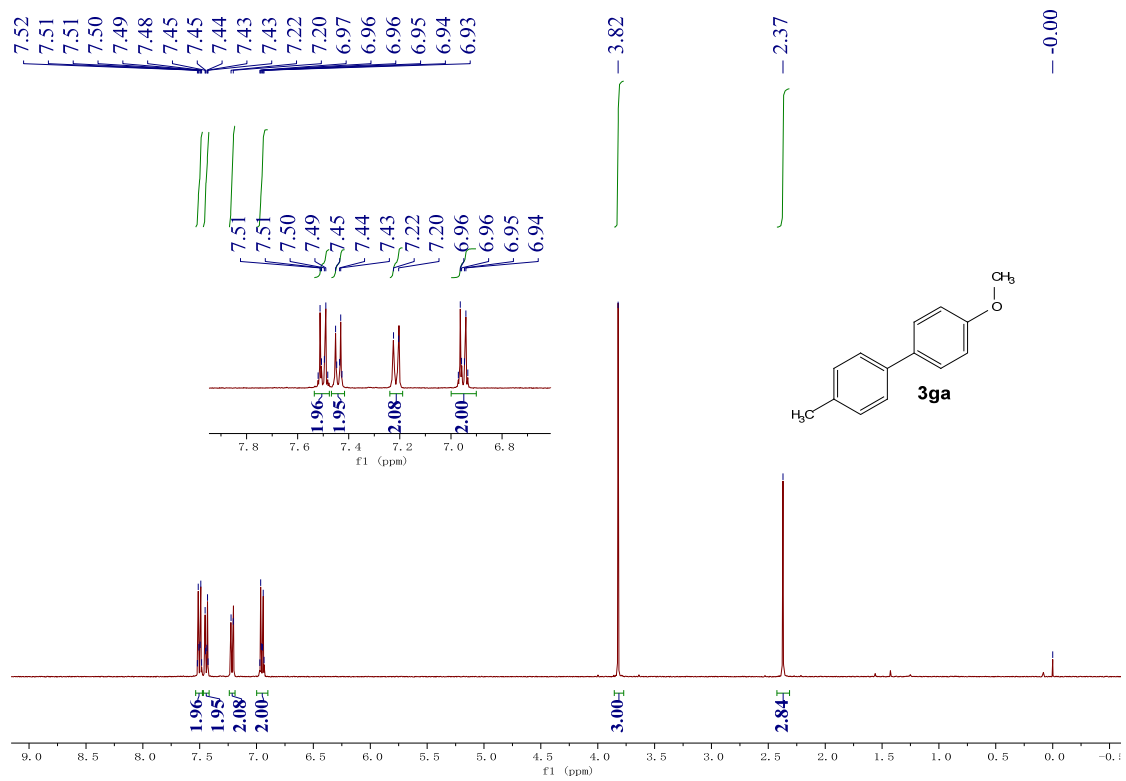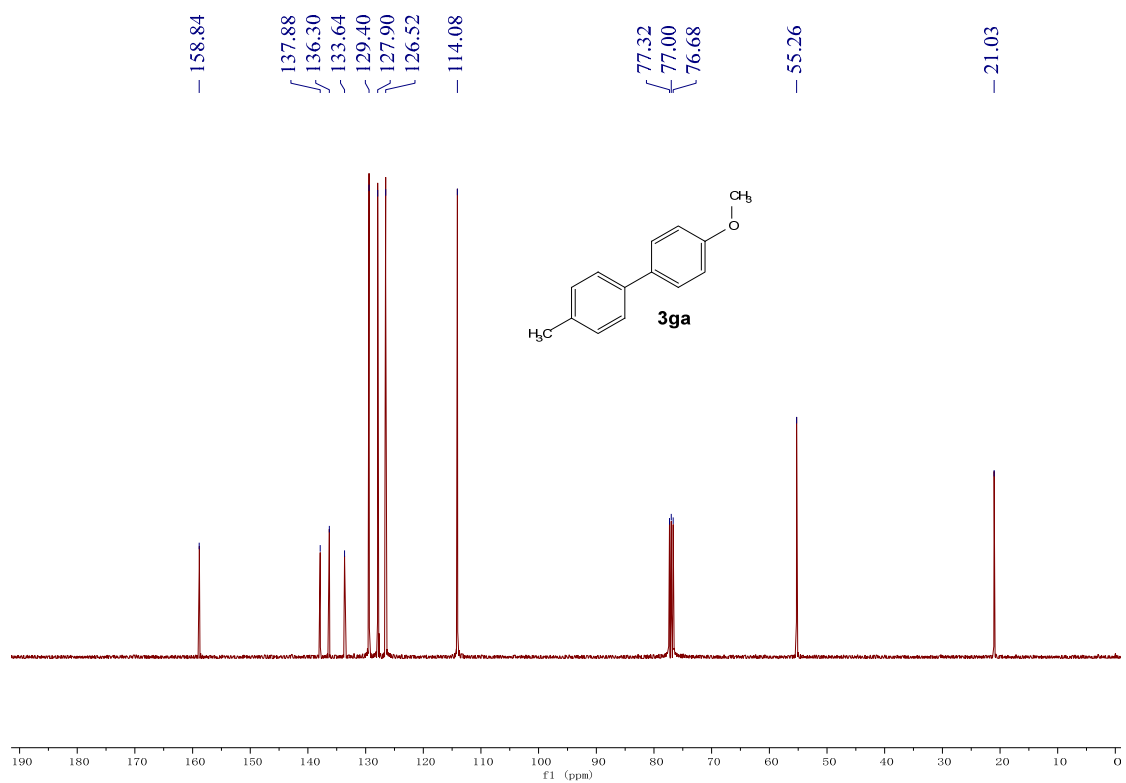

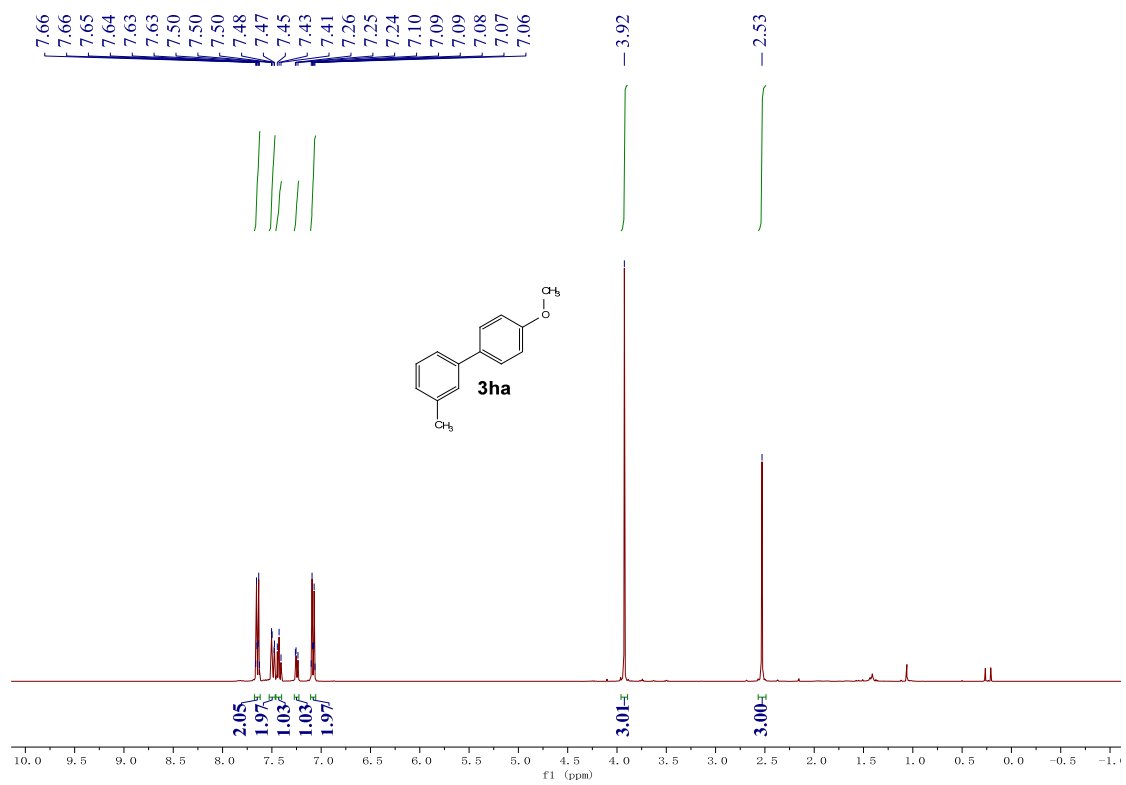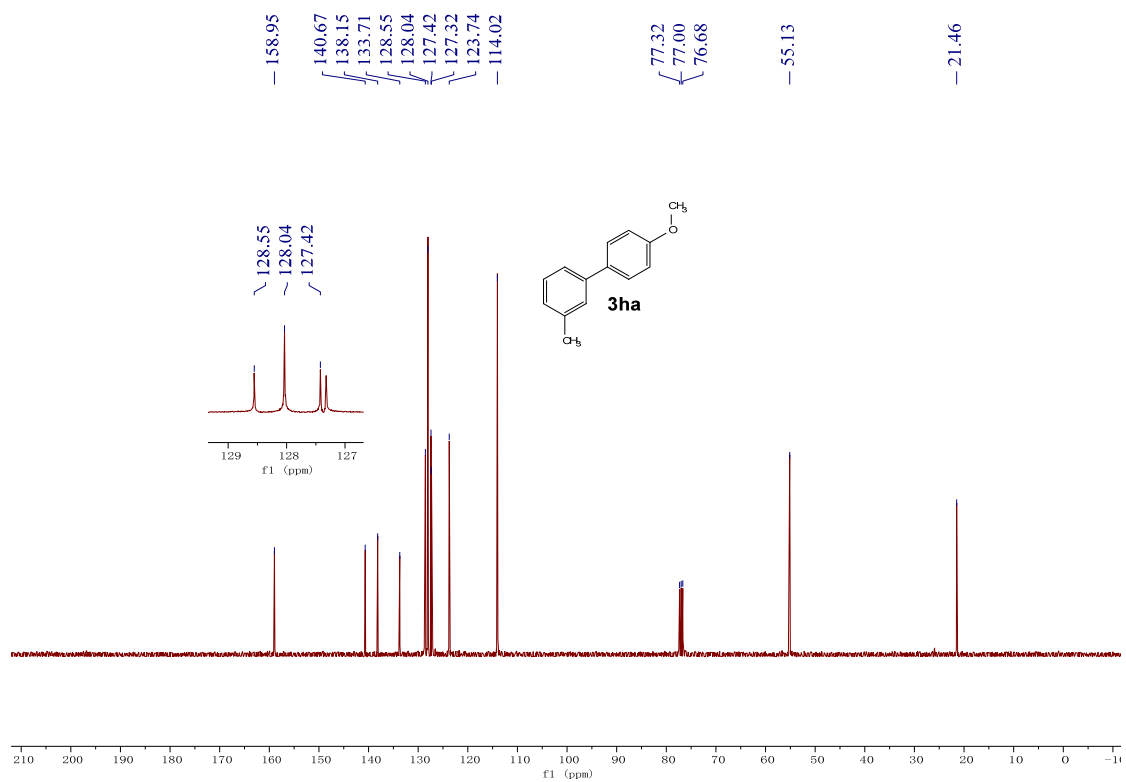

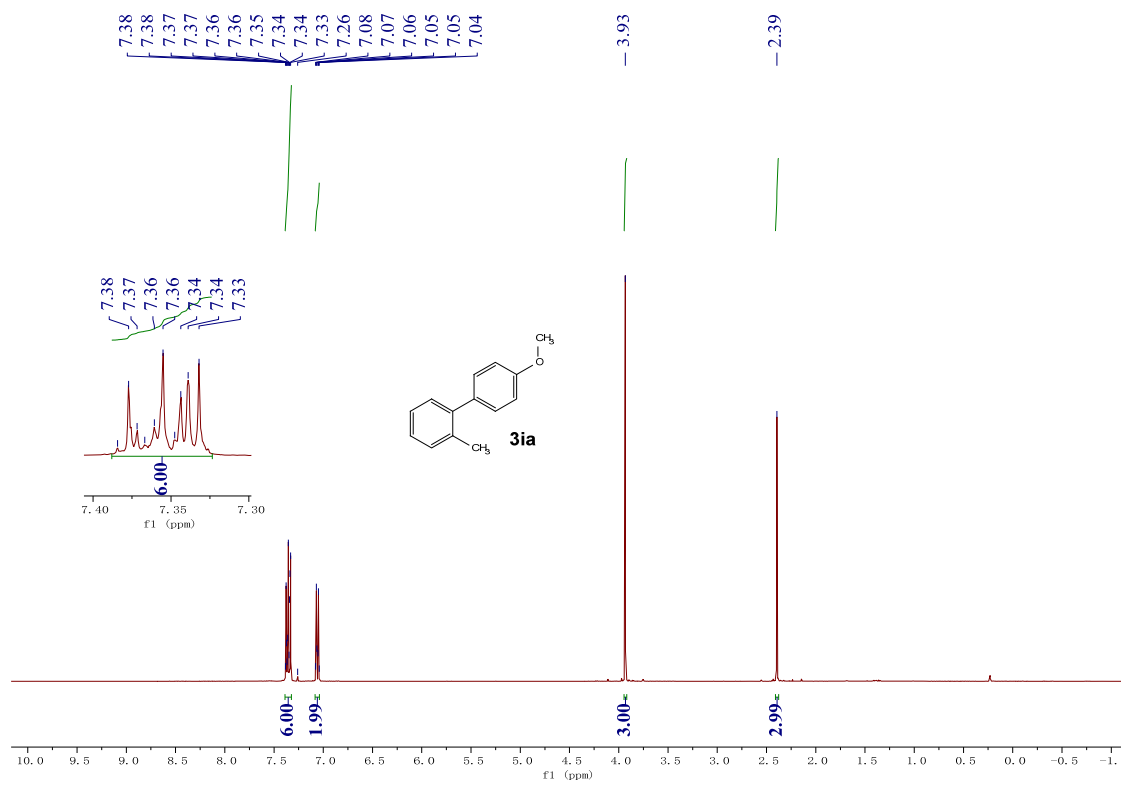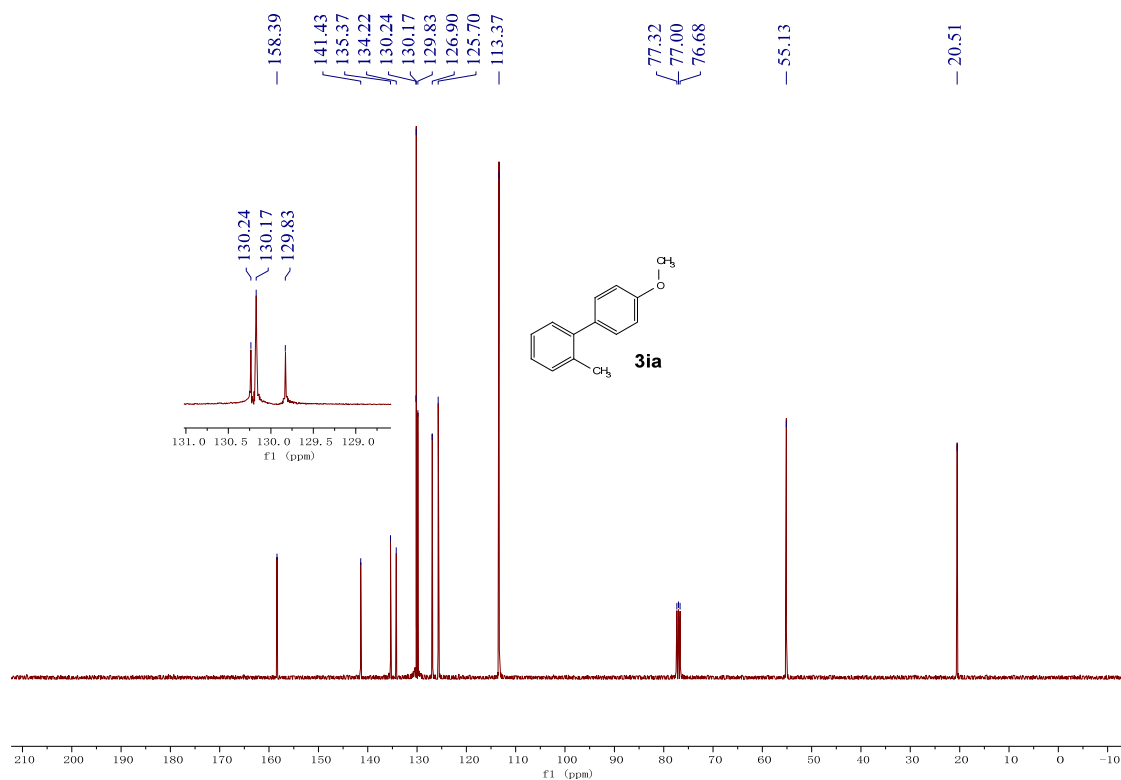

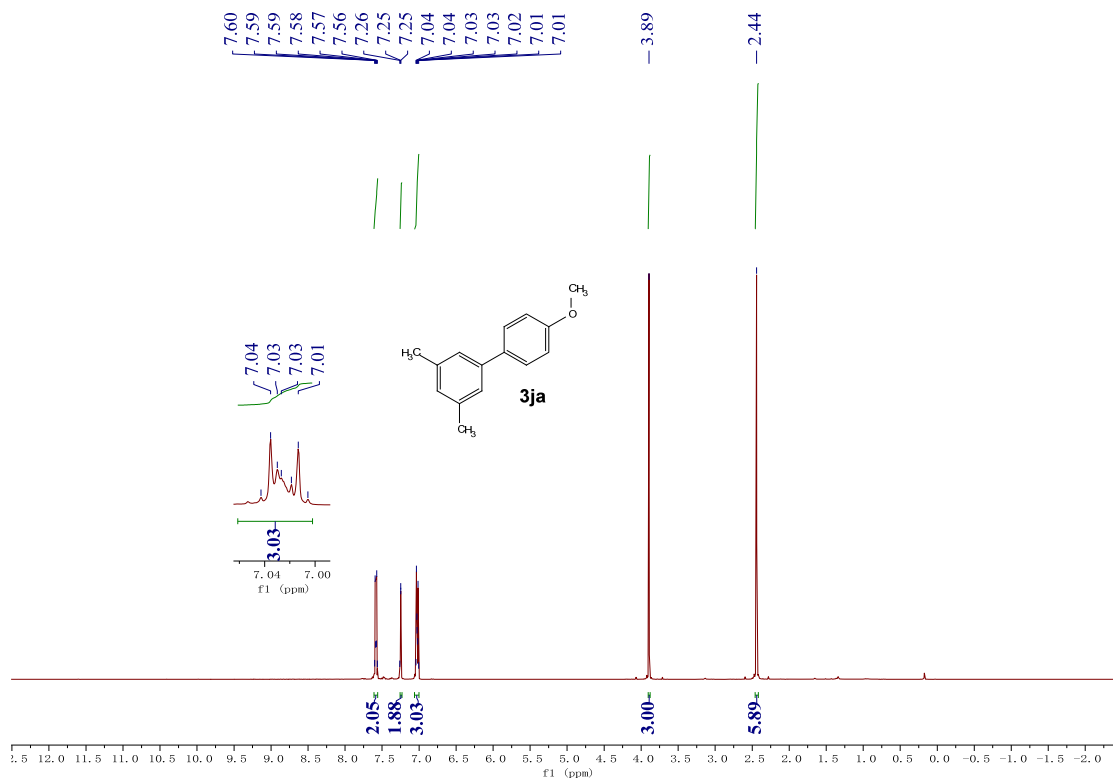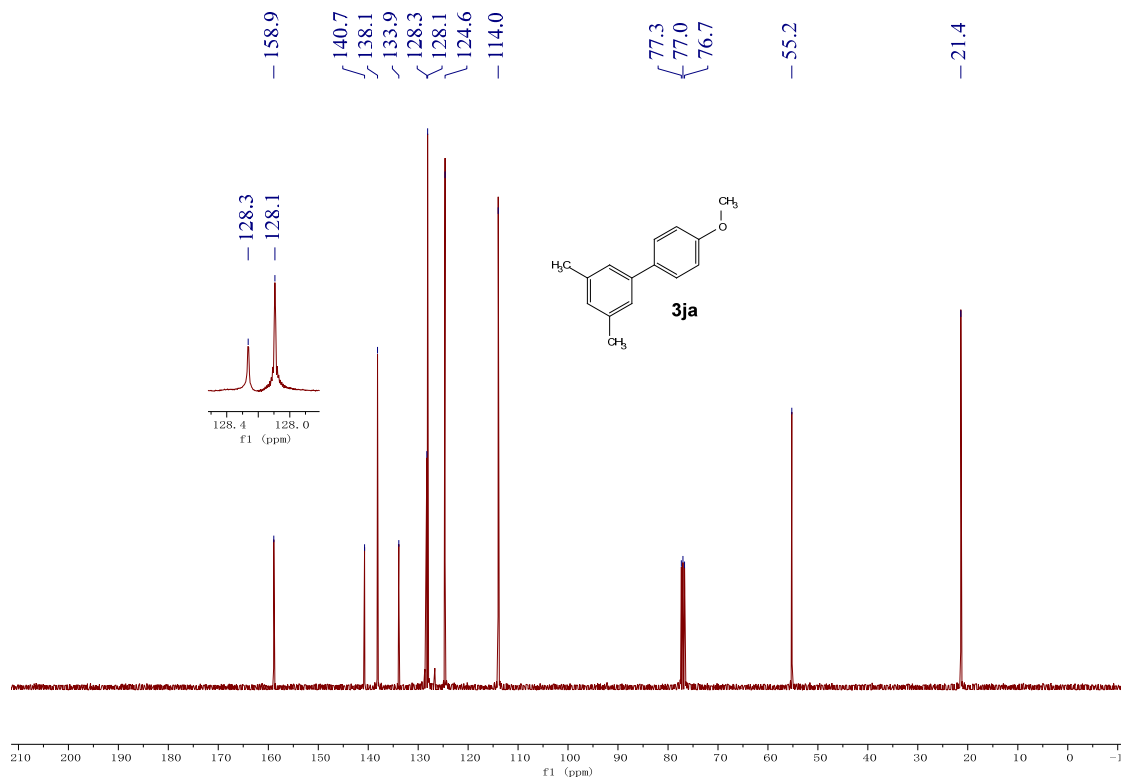



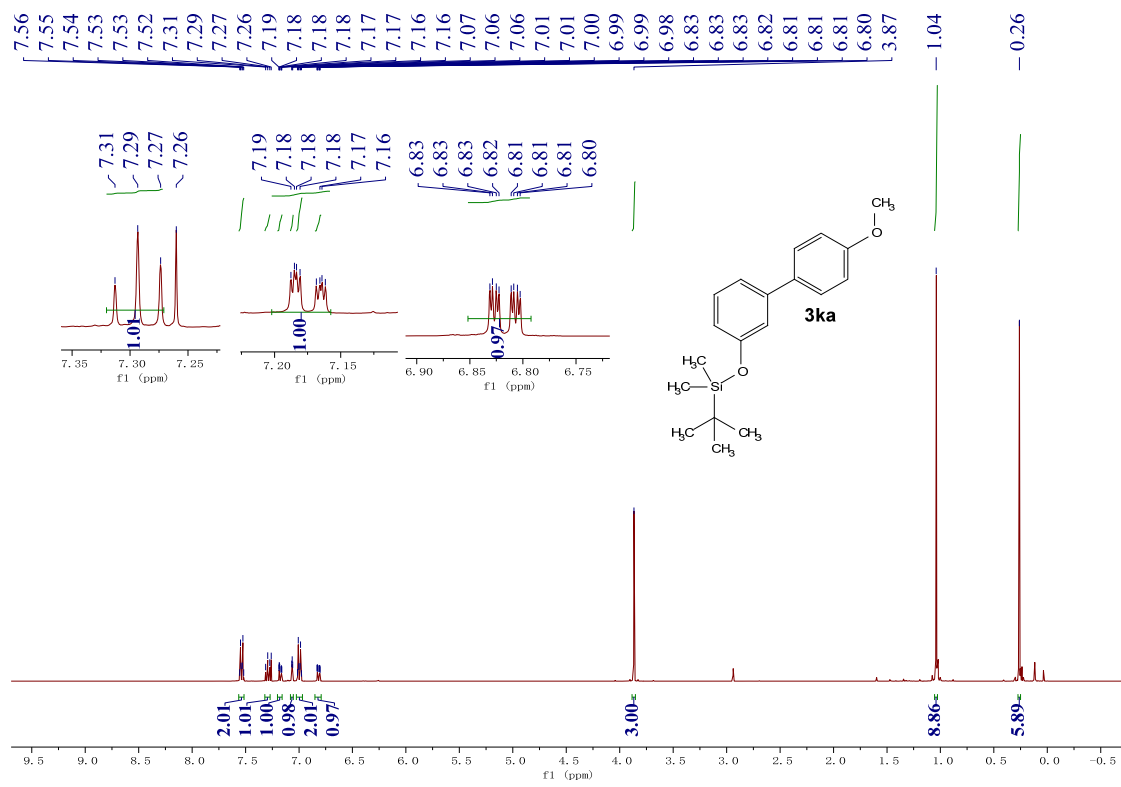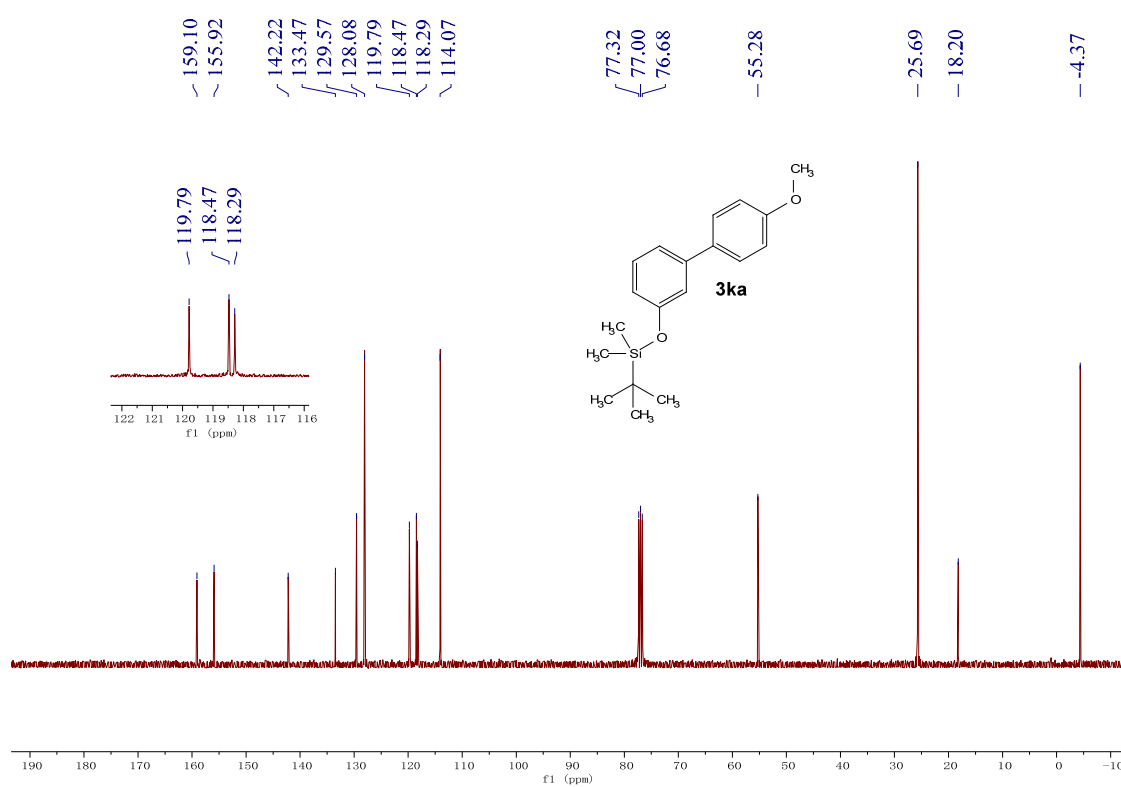

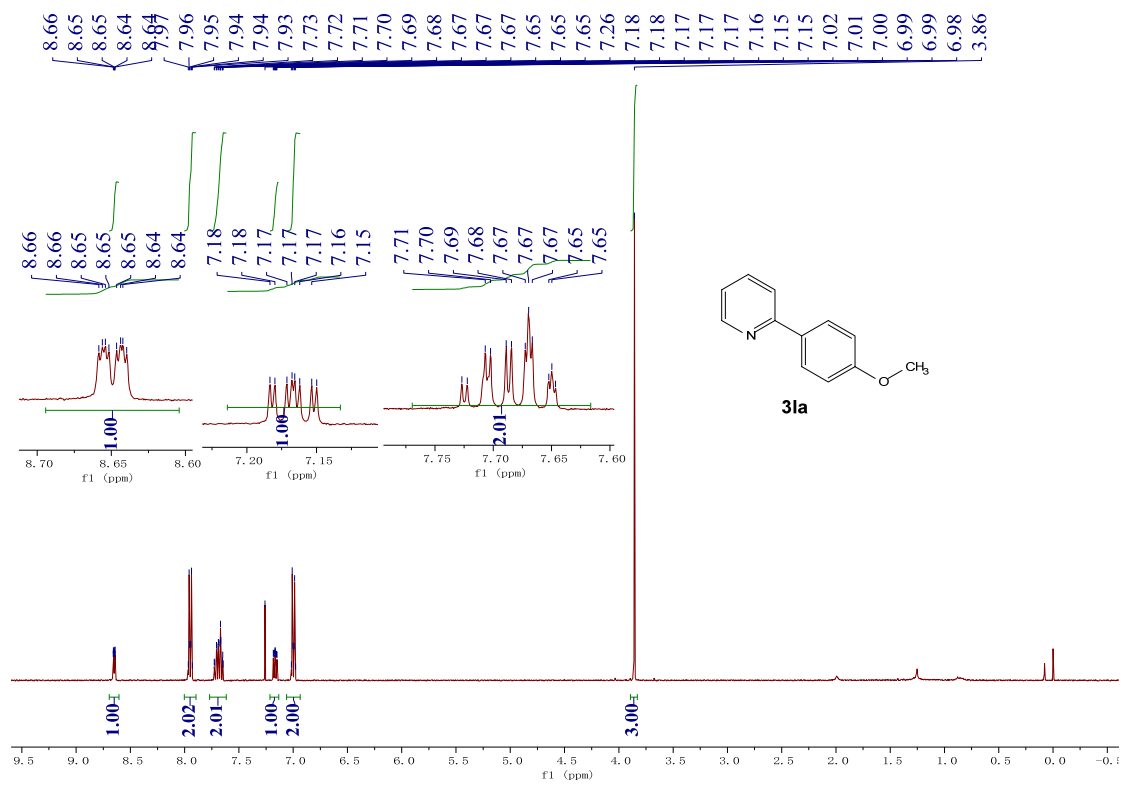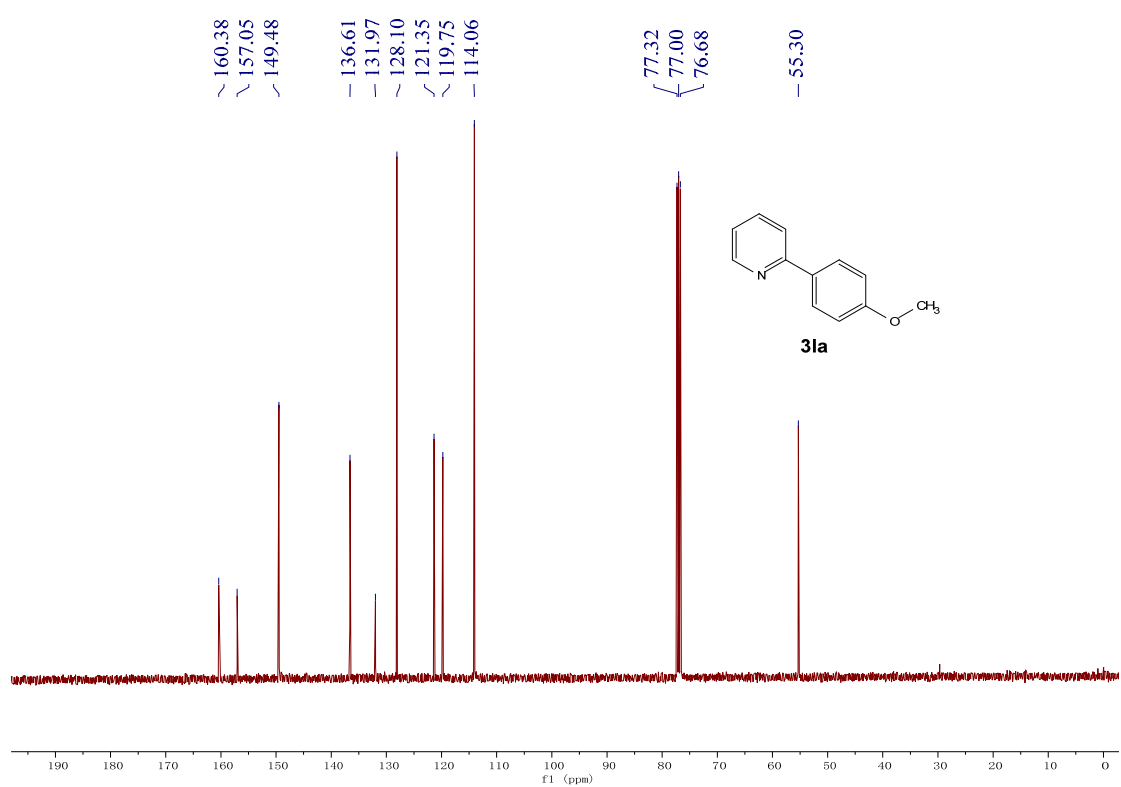

Supplement: d1qo00759a1.pdf [file d1qo00759a1.pdf]
